# 1 **The mammalian cholesterol synthesis enzyme squalene** 2 **monooxygenase is proteasomally truncated to a** 3 **constitutively active form**

4 Hudson W. Coates<sup>1</sup> and Andrew J. Brown<sup>1\*</sup>

5 <sup>1</sup>School of Biotechnology and Biomolecular Sciences, UNSW Sydney, Sydney NSW 2052,  
6 Australia

7 \*To whom correspondence may be addressed. Email: [aj.brown@unsw.edu.au](mailto:aj.brown@unsw.edu.au)

8 **ORCIDs:** H.W.C. (0000-0002-6506-5249); A.J.B. (0000-0002-4475-0116)

9 **Classification:** Biochemistry and Chemical Biology

10 **Keywords:** squalene monooxygenase, cholesterol, ERAD, proteasome, protein degradation

## 11 **Abstract**

12 Squalene monooxygenase (SM) is a rate-limiting enzyme of cholesterol synthesis that is  
13 oncogenic in a range of cancer types. SM is subject to feedback regulation via cholesterol-  
14 induced degradation, which depends on its lipid-sensing N terminal regulatory domain. Here, we  
15 characterize an endogenous truncated form of SM and show that it is cholesterol-resistant, and  
16 therefore constitutively active. Truncation of SM occurs during its endoplasmic reticulum-  
17 associated degradation and requires the proteasome, which partially degrades the SM N-terminus  
18 and eliminates cholesterol-sensing elements within this region. Using mutagenesis studies, we  
19 demonstrate that partial degradation of SM depends on both an intrinsically disordered region  
20 near the truncation site and the stability of the adjacent catalytic domain. Finally, truncation  
21 converts SM from an integral to a peripheral ER membrane protein. These findings uncover an  
22 additional layer of complexity in the cellular control of cholesterol synthesis and establish SM as  
23 the first eukaryotic enzyme known to undergo proteasomal truncation.

## 24 **Introduction**

25 Cholesterol is a vital lipid that serves many important functions in mammalian cells,  
26 including the maintenance of membrane fluidity and integrity, the assembly of cell surface  
27 microdomains for signaling and adhesion, and the synthesis of steroid hormones [1].  
28 Nevertheless, excess cholesterol is cytotoxic and linked with the onset of cardiovascular disease

29 and cancer [2, 3]. It is therefore essential that cells tightly control cholesterol homeostasis by  
30 balancing its uptake, synthesis and efflux [4].

31 The regulation of cholesterol synthesis is especially exquisite, given the energy- and  
32 oxygen-intensive nature of the pathway. A critical point at which this regulation is exerted is  
33 squalene monooxygenase (SM, also known as squalene epoxidase or SQLE; EC:1.14.14.17), an  
34 ER-localized and rate-limiting enzyme responsible for the conversion of squalene to  
35 monooxidosqualene [5]. SM is positioned within the branch of the mevalonate pathway that is  
36 committed to cholesterol synthesis, contrasting it with the upstream rate-limiting enzyme and  
37 well-studied target of the statins, HMG-CoA reductase. Therefore, SM may be an alternative  
38 target for the treatment of hypercholesterolemia [6]. Recent years have also seen increasing  
39 recognition of SM as oncogenic in a range of malignancies including breast cancer [7], prostate  
40 cancer [8] and hepatocellular carcinoma [9]. Moreover, the SM substrate squalene is implicated  
41 either as a cytotoxic intermediate [10] or as protective against cancer cell death [11], depending  
42 on the cellular context. These reports raise the interesting prospect of targeting SM  
43 therapeutically. As the direct pharmacological inhibition of SM is toxic in mammals [12],  
44 indirect inhibition by modulating its physiological regulation may be a more viable strategy.

45 At the transcriptional level, SM expression is controlled by sterol regulatory element-  
46 binding proteins, the master regulators of cholesterologenic genes [13, 14]. Acute regulation  
47 occurs at the post-translational level, where SM undergoes accelerated degradation in response to  
48 increased cholesterol levels [5]. Reciprocally, SM is stabilized by the allosteric binding of  
49 squalene [15, 16]. These responses require the N-terminal one hundred amino acids of SM  
50 (SM-N100), a regulatory domain that is both necessary and sufficient for cholesterol- and  
51 squalene-sensing [5, 15, 17, 18]. The SM-N100 domain is absent from the yeast orthologue of  
52 SM, Erg1p, despite high sequence conservation within the SM catalytic domain [5]. This  
53 suggests that the lipid-sensing capabilities of SM are unique to higher eukaryotes, in which more  
54 nuanced regulation of cholesterol synthesis is required. Cholesterol and squalene affect the  
55 stability of SM by modulating its ubiquitination by the E3 ubiquitin ligase membrane-associated  
56 RING-CH-type finger 6 (MARCHF6), thereby promoting or preventing its endoplasmic  
57 reticulum-associated degradation (ERAD) [15, 19]. Beyond MARCHF6, the ERAD of SM  
58 involves additional effectors including the AAA+-type ATPase valosin containing protein  
59 (VCP), which extracts client proteins from the ER membrane, the E2 conjugating enzyme  
60 Ube2J2, deubiquitinases, and the 26S proteasome [5, 20, 21]. Plasmalogen glycerophospholipids  
61 and unsaturated fatty acids also regulate the MARCHF6-mediated degradation of SM [22, 23],  
62 implying that SM responds to other classes of lipids. However, further details of the SM ERAD  
63 mechanism remain to be elucidated.

64 Previously, we reported that immunoblotting of SM in HEK293 cell lysates detected full-  
65 length SM as well as a lower-molecular weight, putatively truncated form of SM [15]. In the  
66 present study, we characterize this SM variant and show that it arises from partial proteasomal  
67 degradation of the SM-N100 regulatory domain (referred to herein as proteasomal truncation).

68 This has been described for only two other human proteins, NF- $\kappa$ B and Gli3, where it results in  
69 major changes to protein function [24, 25]. In the case of SM, proteasomal truncation depends on  
70 an intrinsically disordered region adjacent to the truncation site, as well as the stability of the  
71 C-terminal catalytic domain. Truncation yields a constitutively active form of SM that is resistant  
72 to cholesterol-accelerated degradation and has an altered ER membrane topology. Therefore, this  
73 study uncovers an additional mode by which SM activity is regulated and establishes the first  
74 known example of a proteasomally truncated eukaryotic enzyme.

## 75 **Results**

### 76 **A truncated, cholesterol-insensitive form of SM is present in a variety of cell types**

77 We previously reported that anti-SM immunoblotting of HEK293 cell lysates detected  
78 full-length SM (~64 kDa) as well as a lower molecular weight protein (~55 kDa) that was  
79 derived from the *squalene epoxidase* (*SQLE*) gene and strongly stabilized by the SM inhibitor  
80 NB-598 [15]. This protein will henceforth be referred to as truncated SM (trunSM). Here, we  
81 observed expression and NB-598-induced stabilization of trunSM in the commonly used  
82 HEK293T and HeLaT cell lines, as well as cell lines derived from tissues that actively synthesize  
83 cholesterol: Huh7 (liver), HepG2 (liver) and Be(2)-C (brain) (Fig. 1A). A trunSM-like protein  
84 was also detected in the CHO subline CHO-7, where it was stabilized by prolonged NB-598  
85 treatment (Supplementary Fig. S1). These observations confirmed that trunSM production is  
86 generalizable to a range of human cell types and the hamster orthologue of SM.

87 To further characterize trunSM, we examined its stability by treating HEK293T cells  
88 with the protein synthesis inhibitor cycloheximide in the presence or absence of NB-598. The  
89 trunSM protein was remarkably long-lived: in the absence of NB-598, ~80% of its starting  
90 material remained after 24 h of cycloheximide treatment, compared with only ~15% of full-  
91 length SM (Fig. 1B). NB-598 had no effect on the disappearance of full-length SM but markedly  
92 induced trunSM formation, with total SM levels (the sum of full-length SM and trunSM)  
93 remaining constant during the treatment. This strongly suggested that trunSM is derived from  
94 full-length SM, and that NB-598 promotes this conversion. In a similar experiment, we used co-  
95 treatment with cycloheximide and exogenous cholesterol to test if trunSM undergoes the  
96 cholesterol-accelerated degradation characteristic of full-length SM [5]. Strikingly, cholesterol  
97 had no effect on trunSM levels, whereas accelerated degradation of SM was apparent within 2 h  
98 of cholesterol treatment (Fig. 1C). Together, these data indicated that trunSM is induced by  
99 NB-598 yet resistant to both basal and cholesterol-induced degradation, raising the possibility  
100 that it lacks part or all of the SM-N100 domain. This was consistent with the shift in apparent  
101 molecular weight between SM and trunSM, which corresponded to a difference of ~50–100  
102 amino acids.

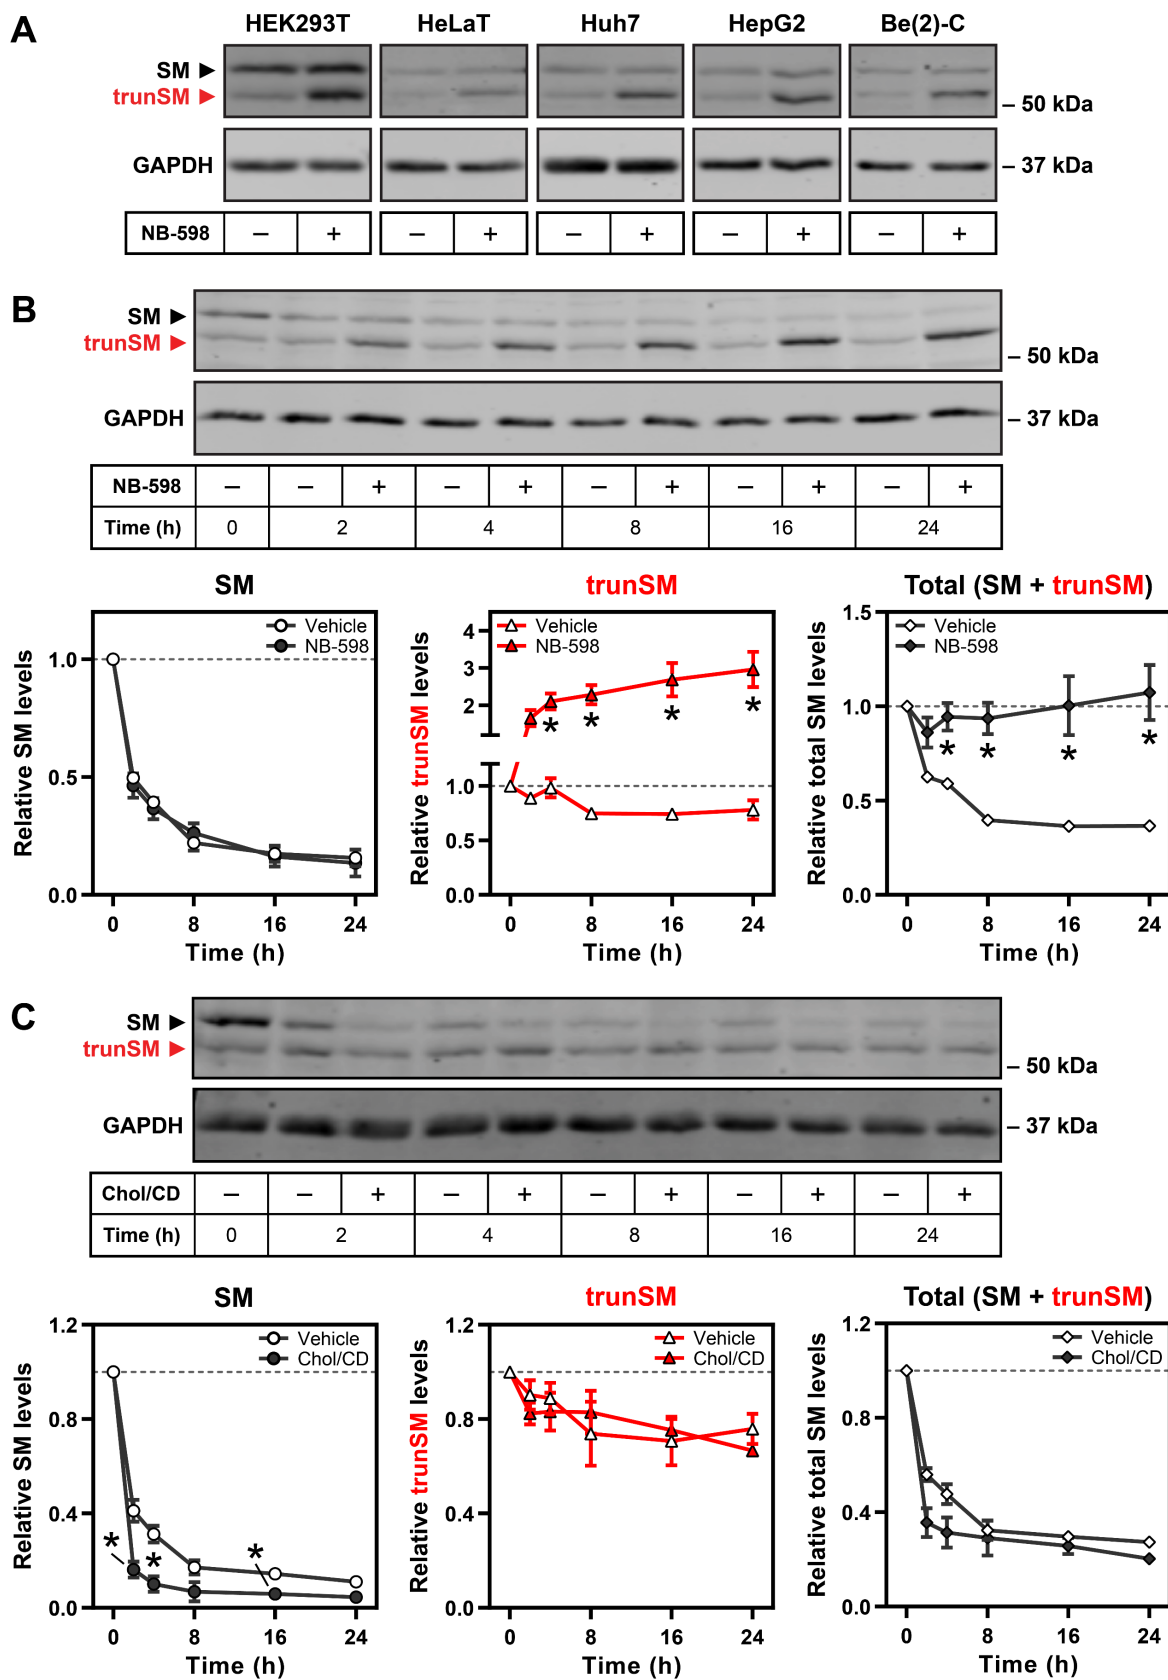

104 **Figure 1. A truncated, cholesterol-insensitive form of SM is present in a variety of cell types**

105 **(A)** The indicated cell lines were treated in the presence or absence of 1  $\mu$ M NB-598 for 8 h, and  
106 immunoblotting was performed for SM and truncated SM (trunSM, red). Immunoblots are  
107 representative of  $n \geq 3$  (HEK293T, HeLaT, Huh7, HepG2) or  $n = 1$  (Be(2)-C) independent  
108 experiments.

109 **(B, C)** HEK293T cells were treated with 10  $\mu$ g/mL cycloheximide in the presence or absence of  
110 (B) 1  $\mu$ M NB-598 or (C) 20  $\mu$ g/mL cholesterol-methyl- $\beta$ -cyclodextrin complexes (Chol/CD) for  
111 the indicated times. Graphs depict densitometric quantification of SM levels (left), trunSM levels  
112 (center), or total SM levels (SM + trunSM; right) normalized to the 0 h timepoint, which was set  
113 to 1 (dotted line). Data presented as mean  $\pm$  SEM from  $n \geq 3$  independent experiments (\*,  
114  $p \leq 0.05$ ; two-tailed paired  $t$ -test vs. vehicle condition).

## 115 **trunSM is not produced by alternative *SQLE* transcripts**

116 The GENCODE- and RefSeq-annotated human genomes each predict a different protein-  
117 coding isoform of *SQLE*. These isoforms utilize alternative first exons that substitute the coding  
118 sequence of the first 97 amino acids of full-length SM with a two- or 39-amino acid sequence,  
119 respectively (Fig. 2A). Given our hypothesis that trunSM lacks the SM-N100 domain, as well as  
120 the similarity between the apparent molecular weight of trunSM (~55 kDa) and the predicted  
121 molecular weights of the *SQLE* isoforms (53.1 kDa for the GENCODE isoform, *trunSQLE1*; and  
122 57.6 kDa for the RefSeq isoform, *trunSQLE2*), we sought to confidently rule out the possibility  
123 that trunSM arises from alternative *SQLE* transcripts.

124 To this end, we transfected HEK293T cells with siRNA targeting exon 9 of *SQLE*, which  
125 is present in all three *SQLE* isoforms (quantified collectively as *totalSQLE*), or exon 1 of the  
126 canonical *SQLE* isoform only (*fullSQLE*; Fig. 2A). Both siRNAs reduced trunSM protein levels  
127 (Fig. 2B) whereas *trunSQLE1* mRNA expression was downregulated by only exon 9 siRNA,  
128 ruling out this isoform as giving rise to trunSM (Fig. 2C). Unexpectedly, *trunSQLE2* mRNA  
129 expression was downregulated by exon 1 siRNA, perhaps due to the presence of the siRNA  
130 target sequence in an unannotated 3'-untranslated region of this transcript. To determine the  
131 likelihood of *trunSQLE2* accounting for trunSM formation, we next performed absolute  
132 quantification of *SQLE* cDNA. Full-length *SQLE* cDNA comprised the great majority of *SQLE*  
133 transcripts ( $\sim 1.6 \times 10^7$  cDNA copies per  $\mu\text{g}$  of reverse transcribed RNA), while *trunSQLE1* and  
134 *trunSQLE2* cDNA were less abundant by over two orders of magnitude ( $\sim 8.0 \times 10^4$  and  $\sim 1.5 \times 10^5$   
135 cDNA copies, respectively) (Fig. 2D). Given that (1) trunSM protein levels are comparable to  
136 full-length SM (Fig. 2B), (2) NB-598-induced accumulation of trunSM occurs in the presence of  
137 the protein synthesis inhibitor cycloheximide (Fig. 1B), and (3) we later found that ectopic SM  
138 also produces a trunSM-like fragment (Fig. 3A), we concluded that trunSM is highly unlikely to  
139 be derived from lowly-abundant *SQLE* isoforms.

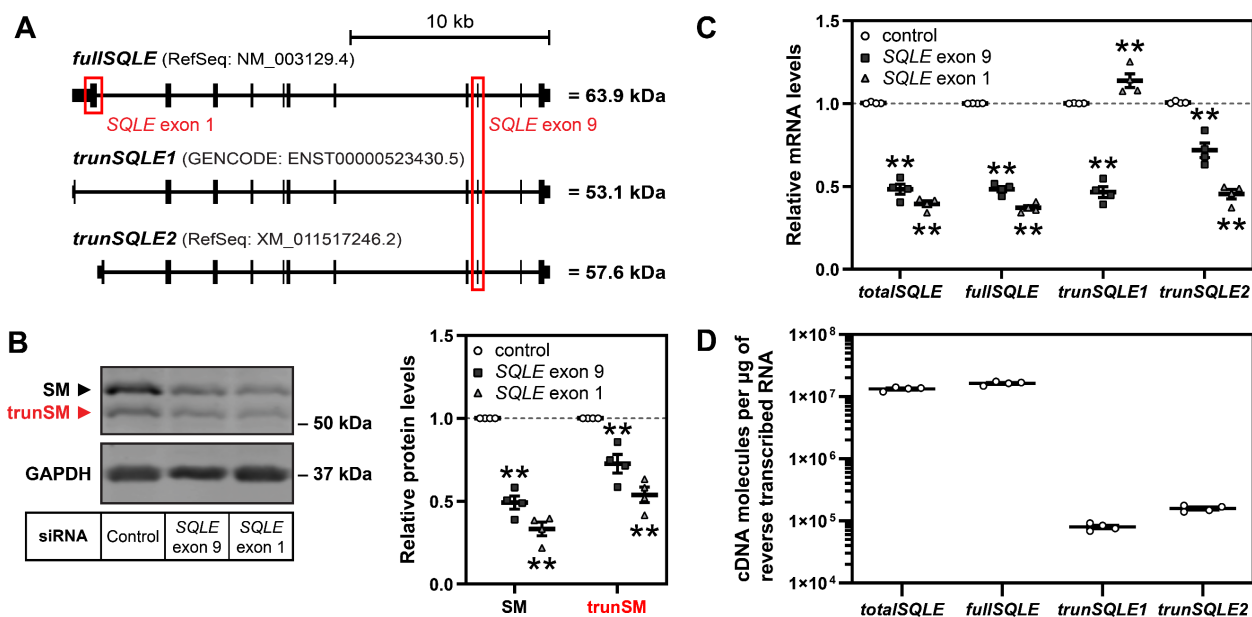

140

141 **Figure 2. trunSM is not produced by alternative *SQLE* transcripts**

142 **(A)** Schematic of full-length (*fullSQLE*) and alternative protein-coding (*trunSQLE1*, *trunSQLE2*)  
 143 *SQLE* transcripts. Exons and untranslated regions are indicated by black bars and siRNA target  
 144 regions are indicated by red boxes.

145 **(B, C)** HEK293T cells were transfected with the indicated siRNAs for 24 h and refreshed in  
 146 maintenance medium for a further 24 h. (B) Graph depicts densitometric quantification of SM  
 147 and trunSM levels normalized to the control siRNA condition, which was set to 1 (dotted line).  
 148 (C) *SQLE* transcript levels were normalized to *PBGD* housekeeping transcript levels and  
 149 adjusted relative to the control siRNA condition, which was set to 1 (dotted line).

150 **(D)** Absolute quantification of *SQLE* cDNA levels in control siRNA samples from (C).

151 **(B, C, D)** Data presented as mean  $\pm$  SEM from  $n = 4$  independent experiments, each performed  
 152 in triplicate for qRT-PCR analysis (\*\*,  $p \leq 0.01$ ; two-tailed paired *t*-test vs. control siRNA).

## 153 **trunSM arises from partial proteasomal degradation of the SM N-terminus**

154 To determine if trunSM is a proteolytic product of full-length SM, we transfected  
155 HEK293T cells with SM fused to N-terminal (HA)<sub>3</sub> and C-terminal V5 epitope tags ([HA]<sub>3</sub>-SM-  
156 V5). Immunoblotting detected two C-terminally-tagged proteins with molecular weights  
157 corresponding to SM and trunSM, the latter of which was stabilized by NB-598 (Fig. 3A). Only  
158 the full-length protein was N-terminally tagged, confirming that the trunSM-like fragment lacks  
159 the SM N-terminus. Interestingly, we were unable to recover a low-molecular weight, N-  
160 terminally tagged fragment, suggesting that the SM N-terminus undergoes complete proteolysis  
161 during truncation. To estimate the truncation site, we inserted a FLAG epitope tag at various  
162 positions within the (HA)<sub>3</sub>-SM-V5 construct and monitored for its appearance in the truncated  
163 fragment. Truncation eliminated the FLAG tag when it was inserted after SM residue 60 but not  
164 residue 70 (Supplementary Fig. S2A), implying that truncation occurs between these two  
165 residues. Therefore, trunSM lacks part of the SM-N100 regulatory domain but retains the full  
166 C-terminal catalytic domain.

167 Given that SM truncation does not yield an intact N-terminal fragment (Fig. 3A), we  
168 hypothesized that trunSM formation requires the proteasome and, by extension, the ERAD of  
169 SM. ERAD effectors involved in the proteasomal degradation of SM include the AAA+-type  
170 ATPase VCP, the E3 ubiquitin ligase MARCHF6 and its associated E2 conjugating enzyme  
171 Ube2J2, and unidentified deubiquitinases [19, 21]. Treating HEK293T cells with VCP,  
172 proteasome or deubiquitinase inhibitors blocked the NB-598-induced accumulation of trunSM  
173 (Fig. 3B), confirming that a functional ERAD pathway and the proteasome are required for  
174 truncation. To corroborate this finding, we performed siRNA-mediated knockdown of ERAD  
175 effectors. Knockdown of *VCP* similarly blunted the NB-598-induced accumulation of trunSM,  
176 whilst *UBE2J2* or *MARCHF6* knockdown had no effect (Fig. 3C, left). However, we noted that  
177 in the absence of NB-598, all three knockdowns had greatly reduced the basal truncation of SM  
178 (Fig. 3C, right; expressed as the ratio between trunSM and full-length SM levels). This suggested  
179 that while Ube2J2 and MARCHF6 are the major E2 and E3 proteins required for SM truncation  
180 under normal conditions, other proteins can compensate for their absence during  
181 NB-598-stimulated truncation. This contrasted with the apparent absolute requirement for VCP.  
182 A lysosome-dependent route for SM degradation has been proposed [9]; however, inhibitors of  
183 lysosomal acidification had no effect on trunSM formation (Supplementary Fig. S2B), further  
184 supporting an ERAD-dependent mechanism.

185 As ERAD requires substrate ubiquitination, we next sought to identify whether a  
186 ubiquitin signal controls truncation. We predicted that this signal would occur within the  
187 SM-N100 regulatory domain, given that SM is truncated at its N-terminus. While mutation of  
188 Lys-82 and the published ubiquitination site Lys-90 [26] slightly reduced the truncation of the  
189 (HA)<sub>3</sub>-SM-V5 construct, a more marked effect was observed upon combined mutation of the  
190 Lys-82/90/100 cluster (Fig. 3D; Supplementary Fig. S2C), implying functional redundancy  
191 amongst these residues. This reduction in truncation was not compounded by additional mutation



192 of Lys-15/16, residues located nearer to the SM N-terminus, suggesting that Lys-82, Lys-90 and  
193 Lys-100 are most critical for truncation. We previously showed that threonine, serine and  
194 cysteine residues within SM-N100 contribute to the cholesterol-accelerated degradation of SM,  
195 with Ser-83 serving as a non-canonical ubiquitination site [20] (Supplementary Fig. S2C).  
196 However, mutating these residues did not affect truncation (Fig. 3D). Given that lysine residues  
197 within the SM-N100 domain are not required for cholesterol-accelerated degradation of SM [5,  
198 20], this indicated that the proteasomal truncation of SM depends on a distinct ubiquitin signal.

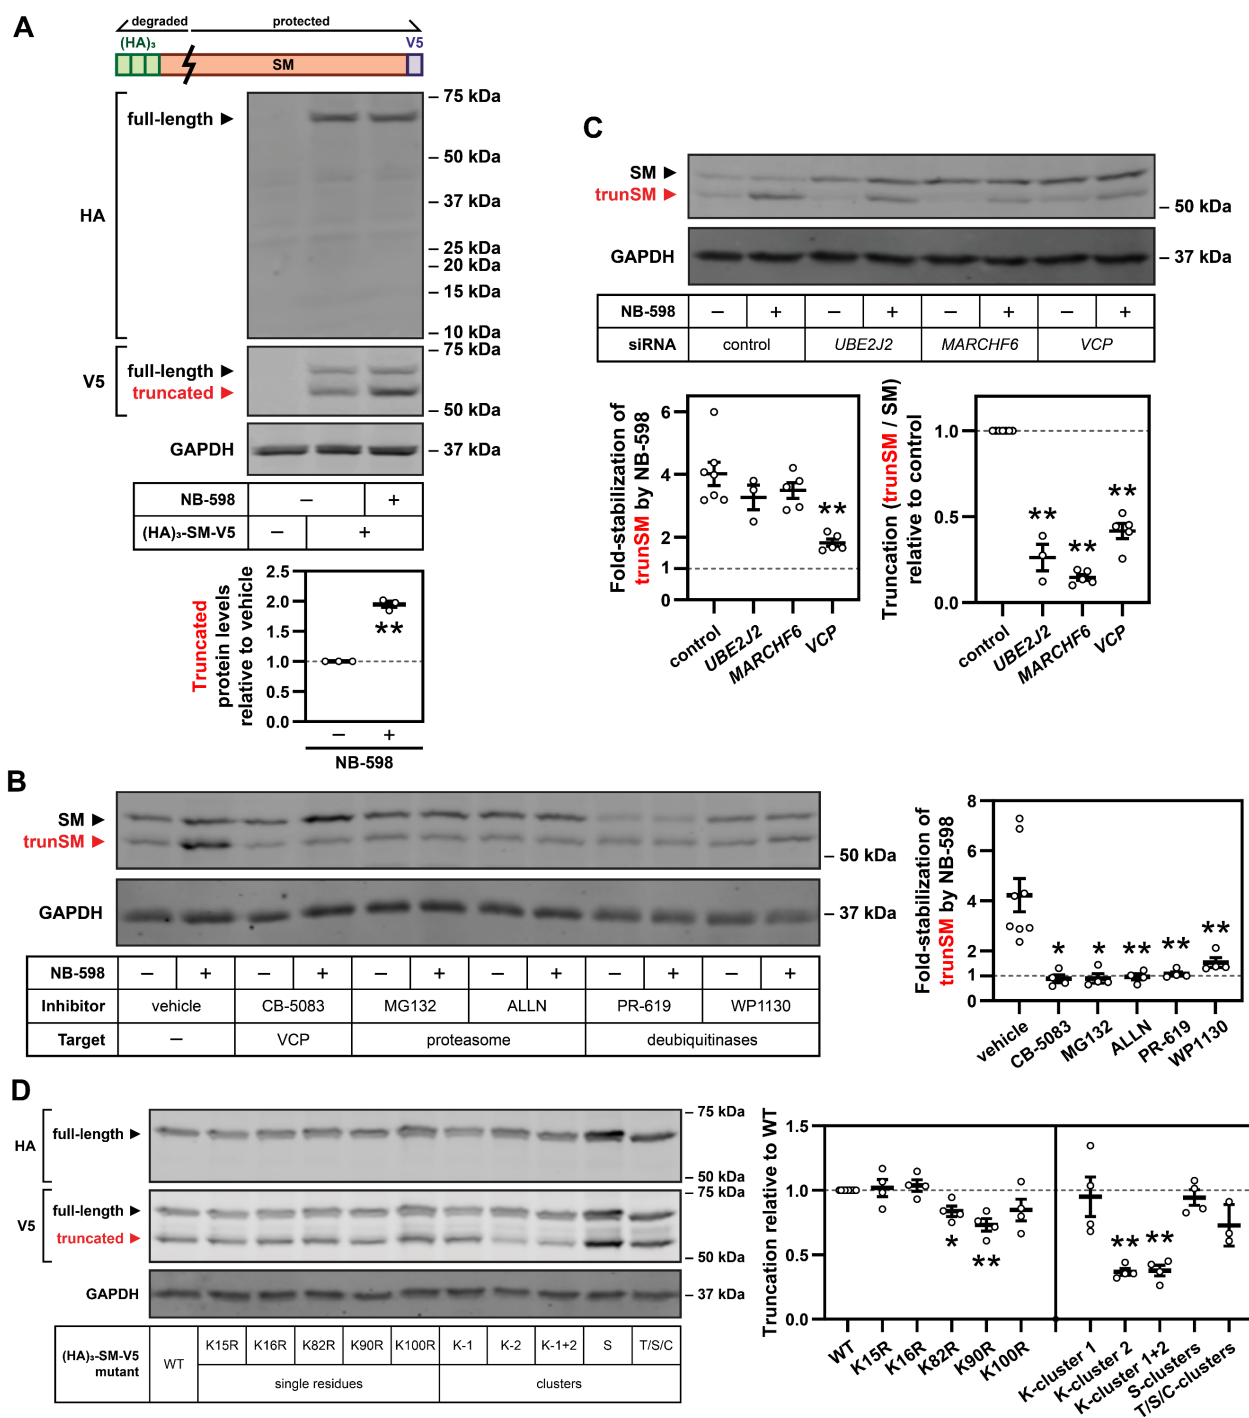

200 **Figure 3. trunSM arises from partial proteasomal degradation of the SM N-terminus**

201 **(A)** HEK293T cells were transfected with empty vector or pCMV-(HA)<sub>3</sub>-SM-V5 expression  
202 vector for 24 h, refreshed in maintenance medium for 16 h, and treated in the presence or  
203 absence of 1 μM NB-598 for 8 h. Lysates were separated by 4–15% gradient Tris-glycine SDS-  
204 PAGE. Graph depicts densitometric quantification of truncated protein levels normalized to the  
205 vehicle condition, which was set to 1 (dotted line).

206 **(B)** HEK293T cells were treated with 5 μM CB-5083, 20 μM MG132, 25 μg/mL ALLN, 40 μM  
207 PR-619 or 10 μM WP1130, in the presence or absence of 1 μM NB-598, for 8 h. Graph depicts  
208 densitometric quantification of trunSM stabilization by NB-598.

209 **(C)** HEK293T cells were transfected with the indicated siRNAs for 24 h, refreshed in  
210 maintenance medium for 16 h, and treated in the presence or absence of 1 μM NB-598 for 8 h.  
211 Graphs depict densitometric quantification of (left) trunSM stabilization by NB-598, or (right)  
212 SM truncation normalized to the control siRNA condition, which was set to 1 (dotted line).

213 **(D)** HEK293T cells were transfected with the indicated constructs for 24 h and refreshed in  
214 maintenance medium for 24 h. Graph depicts densitometric quantification of (HA)<sub>3</sub>-SM-V5  
215 truncation normalized to the wild-type (WT) construct, which was set to 1 (dotted line). Cluster  
216 mutations: K-cluster 1 (K15R, K16R); K-cluster 2 (K82R, K90R, K100R); K-cluster 1+2  
217 (K15R, K16R, K82R, K90R, K100R); S-clusters (S59A, S61A, S83A, S87A); T/S/C-clusters  
218 (T3A, T9A, T11A, S43A, C46A, S59A, S61A, S67A, S71A, S83A, S87A).

219 **(A, B, C, D)** Data presented as mean ± SEM from  $n \geq 3$  independent experiments (\*,  $p \leq 0.05$ ;  
220 \*\*,  $p \leq 0.01$ , two-tailed paired *t*-test vs. [A, B] vehicle, [C] control siRNA or [D] WT).

221 **SM truncation depends on an intrinsically disordered region and the stability of the**  
222 **catalytic domain**

223 Few other substrates of partial proteasomal degradation are known. However, two  
224 features are associated with truncation: (1) a low-complexity sequence [27] or (2) high intrinsic  
225 disorder [28]. In both cases, the region must be adjacent to a tightly folded domain that is  
226 resistant to proteasomal unfolding and degradation, allowing an opportunity for substrate release  
227 [27–29]. To investigate whether these features could account for SM truncation, we analyzed the  
228 SM protein sequence using predictors of sequence complexity and intrinsic disorder. Four short  
229 regions of low sequence complexity were located throughout SM, including one within the  
230 SM-N100 domain (residues 51–62; Fig. 4A). Deletion of this region ( $\Delta$ 50–60) slightly reduced  
231 the truncation of the (HA)<sub>3</sub>-SM-V5 construct but did not alter the size of the truncated fragment  
232 (Supplementary Fig. S3A), further supporting the idea that truncation occurs after residue 60.  
233 More strikingly, we identified a highly intrinsically disordered region between residues 83–120  
234 (Fig. 4A), adjacent to the predicted truncation site. By contrast, residues in the C-terminal  
235 direction of this region, comprising the SM catalytic domain, were highly ordered.

236 Supporting the importance of the disordered region in partial degradation of SM, its  
237 deletion ( $\Delta$ 81–120) abolished truncation (Fig. 4B). Halving the length of the disordered region  
238 ( $\Delta$ 91–110) also prevented truncation, whilst tandem duplication of the disordered region (dup81–  
239 120) had little effect, implying that a minimum length of intrinsic disorder is required for this  
240 process. We also noted that the apparent molecular weight of the truncated fragment increased  
241 when the disordered region was duplicated, suggesting that the truncation site remained  
242 unchanged despite the extended disorder length. As the region corresponding to residues 81–120  
243 is highly disordered in SM orthologues from Chinese hamster, chicken, zebrafish and sea  
244 lamprey, despite their differing levels of sequence conservation (Fig. 4C, Supplementary  
245 Fig. S3B and S3C), we next tested the effect of substituting these regions into human SM.  
246 Truncation was maintained or even enhanced in constructs derived from Chinese hamster and  
247 chicken, and approximately halved in constructs derived from zebrafish and sea lamprey SM  
248 (Fig. 4C). The persistence of truncation in all four mutant constructs indicated that the  
249 intrinsically disordered nature of the 81–120 region is sufficient to promote truncation, although  
250 sequence-specific features may have an accessory function.

251 The proteasome typically engages and initiates degradation from intrinsically disordered  
252 regions of its substrates [30]. Therefore, we considered if residues 81–120 of SM are an internal  
253 proteasomal engagement site that results in preferential degradation of the N-terminus. A similar  
254 mechanism has been reported for other substrates of partial degradation [29]. To test this, we  
255 generated N-terminal fusions of SM with two proteins that impede proteasomal processivity: a  
256 30-amino acid glycine-alanine repeat (GAR) from the Epstein-Barr virus nuclear antigen-1 [31],  
257 or dihydrofolate reductase (DHFR), which becomes tightly folded and resistant to degradation  
258 upon the binding of its ligand methotrexate [32]. We reasoned that if degradation were initiated  
259 internally, these fusions would not block truncation but rather protect the N-terminus from

260 complete degradation. However, we found that the fusion of GAR sequences dramatically ablated  
261 truncation, and we were unable to recover N-terminal fragments of the expected molecular  
262 weight (10–15 kDa; Fig. 4D). Fusion of DHFR similarly reduced truncation, and its further  
263 stabilization by methotrexate did not rescue the N-terminus from degradation. This indicated that  
264 partial proteasomal degradation of SM is initiated from the N-terminus rather than an internal  
265 site. To support this conclusion, we further manipulated the SM N-terminus by sequentially  
266 removing HA epitope tags from the (HA)<sub>3</sub>-SM-V5 construct. These tags have a propensity for  
267 intrinsic disorder [33] and may enhance proteasomal engagement at the N-terminus. As  
268 expected, this led to a stepwise reduction in SM truncation (Supplementary Fig. S3D),  
269 confirming that truncation proceeds from the N-terminus.

270 All known examples of partial proteasomal degradation require a tightly folded domain  
271 adjacent to the truncation site. Given that the SM catalytic domain has a compact structure [34]  
272 and is predicted to be highly ordered (Fig. 4A), we considered the possibility that its stability is  
273 also essential for truncation. Supporting this idea was our earlier observation that NB-598  
274 treatment rapidly accumulates trunSM (Fig. 1B). NB-598 is a potent, tight-binding inhibitor of  
275 SM that strongly stabilizes the catalytic domain [34], likely increasing its resistance to  
276 proteasomal unfolding. To examine the inverse situation, we generated point mutations within  
277 the catalytic domain based on the crystal structure of SM [34]. Our rationale was that non-  
278 conservative substitutions in the domain interior would be more destabilizing than conservative  
279 substitutions, which would in turn be more destabilizing than mutations on the domain exterior.  
280 As expected, most of the substitutions significantly reduced SM truncation, and those that were  
281 both internal and non-conservative tended to have a larger effect than those which were  
282 conservative or external (Fig. 4E). Of note, the non-conservative mutation of Tyr-195 (Y195A)  
283 ablated truncation to a greater extent than its conservative equivalent (Y195F). This strongly  
284 suggested that catalytic domain stability is required for partial degradation. Taken together, our  
285 data indicate that the truncation of SM depends on two major structural features: the 81–120  
286 disordered region and the stability of the SM catalytic domain.

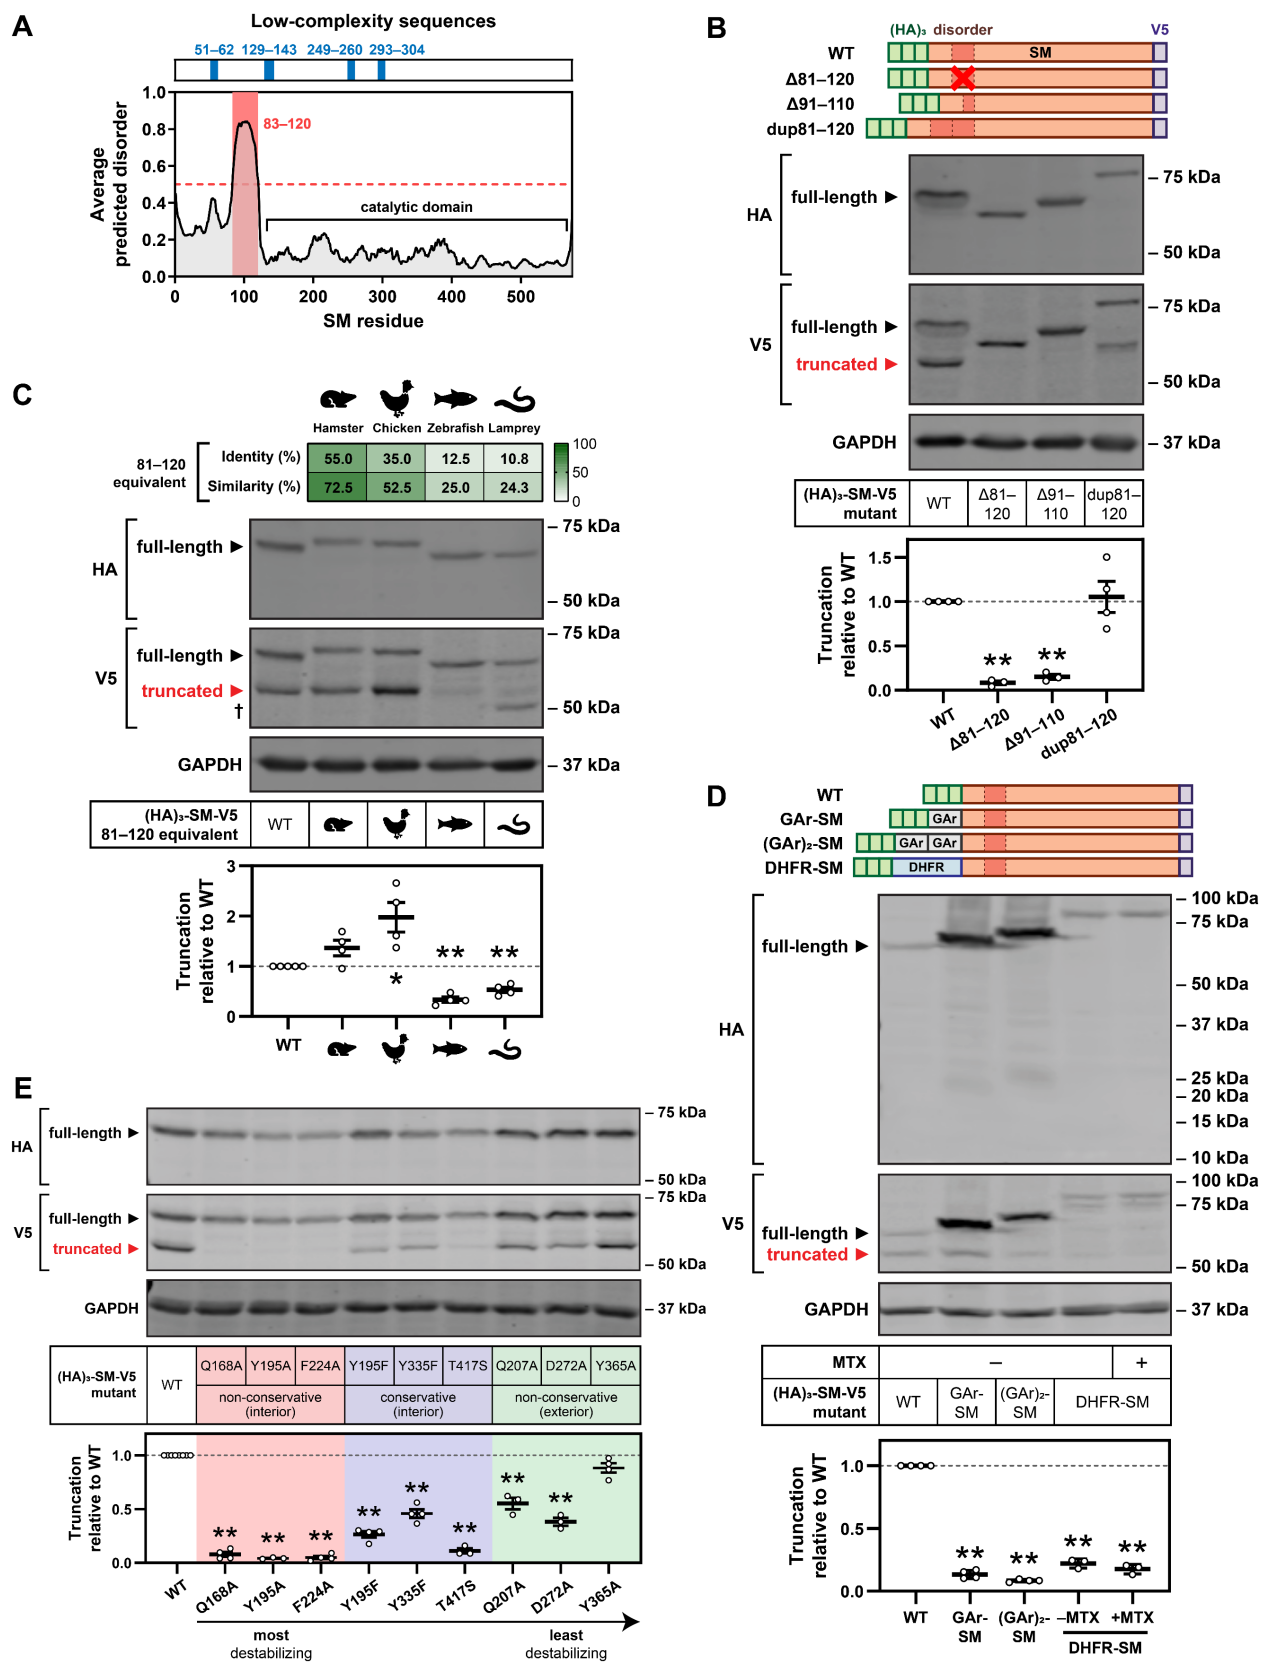

288 **Figure 4. SM truncation depends on an intrinsically disordered region and the stability of**  
289 **the catalytic domain**

290 **(A)** Low-complexity regions (blue) and intrinsically disordered regions (red) within the SM  
291 protein sequence.

292 **(B, C, E)** HEK293T cells were transfected with the indicated constructs for 24 h and refreshed in  
293 maintenance medium for 24 h. (C) Dagger indicates an additional non-trunSM fragment.

294 **(D)** HEK293T cells were transfected with the indicated constructs for 24 h, refreshed in  
295 maintenance medium for 16 h, and treated in the presence or absence of 10  $\mu$ M methotrexate  
296 (MTX) for 8 h. Lysates were separated by 4–15% gradient Tris-glycine SDS-PAGE.

297 **(B – E)** Graphs depict densitometric quantification of (HA)<sub>3</sub>-SM-V5 truncation normalized to the  
298 WT construct, which was set to 1 (dotted line). Data presented as mean  $\pm$  SEM from  $n \geq 3$   
299 independent experiments (\*,  $p \leq 0.05$ ; \*\*,  $p \leq 0.01$ , two-tailed paired  $t$ -test vs. WT).

### 300 **trunSM adopts an altered ER membrane topology**

301 The stability and cholesterol-resistance of trunSM (Fig. 1C), as well as the preservation  
302 of the entire SM catalytic domain following truncation (Supplementary Fig. S2A), suggested that  
303 it would act as a constitutively active form of SM. Previous studies have established that SM  
304 lacking the SM-N100 domain retains catalytic activity [34, 35]; therefore, trunSM is highly  
305 likely to be active. However, this is contingent on trunSM maintaining the ER localization of  
306 full-length SM. Fractionation of HEK293T cell lysates revealed that like full-length SM [5],  
307 trunSM is membrane-associated (Fig. 5A). However, a greater proportion of trunSM was found  
308 in the cytoplasmic fraction compared with full-length SM, particularly in the absence of NB-598.  
309 This suggested that trunSM is more loosely bound to the membrane than full-length SM,  
310 possibly due to the loss of the SM-N100 re-entrant loop (residues ~20–40). To investigate this  
311 further, membranes were isolated and treated with aqueous buffer (control), 1% SDS  
312 (solubilizing), 0.1 M Na<sub>2</sub>CO<sub>3</sub> (high pH) or 1 M NaCl (high salt). Solubilizing conditions disrupt  
313 the membrane association of all membrane proteins, while high-pH or high-salt conditions  
314 release peripheral membrane proteins (in the latter case, those associated *via* electrostatic  
315 interactions) [36, 37]. Both full-length SM and trunSM remained membrane-associated under  
316 aqueous or high-salt conditions and were released into the supernatant fraction under solubilizing  
317 conditions (Fig. 5B). A similar distribution was observed for SM-N100-GFP-V5, a fusion  
318 construct that includes the SM-N100 re-entrant loop [18]. However, unlike full-length SM and  
319 SM-N100-GFP-V5, the membrane association of trunSM was readily disrupted by high-pH  
320 conditions. This suggested that the loss of the SM-N100 re-entrant loop renders trunSM a  
321 peripheral ER membrane protein.



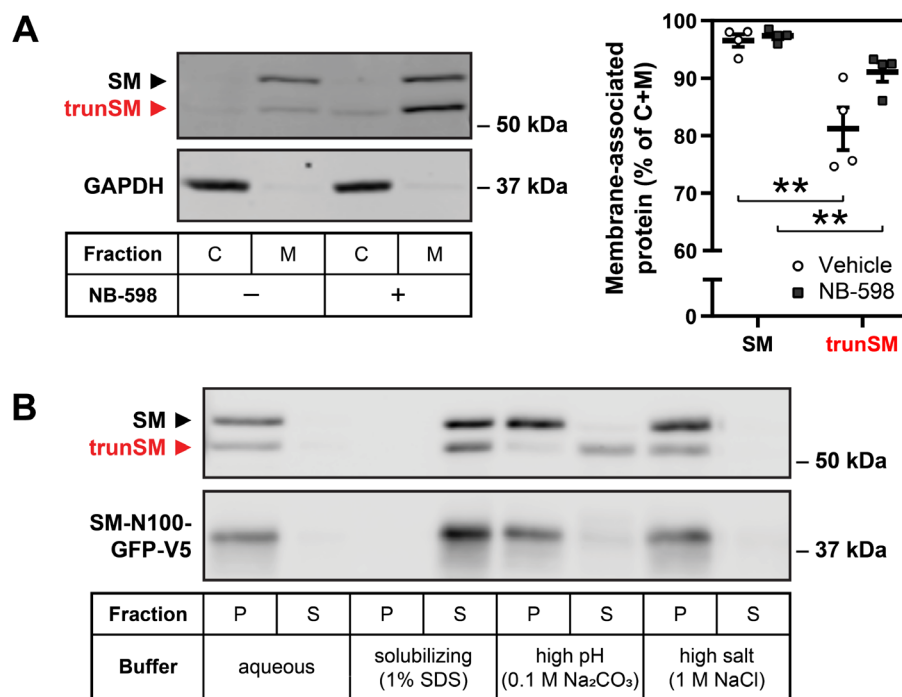

322

323 **Figure 5. trunSM adopts an altered ER membrane topology**

324 **(A)** HEK293T cells were treated in the presence or absence of 1  $\mu$ M NB-598 for 8 h, and  
 325 cytosolic (C) or membrane (M) fractions were isolated. Graph depicts the proportion of overall  
 326 protein (C + M) found in the membrane fraction. Data presented as mean  $\pm$  SEM from  $n = 4$   
 327 independent experiments (\*\*,  $p \leq 0.01$ , two-tailed paired  $t$ -test vs. SM).

328 **(B)** HEK293T cells were transfected with pTK-SM-N100-GFP-V5 for 24 h and refreshed in  
 329 maintenance medium for a further 24 h. Membrane fractions were isolated and treated as  
 330 indicated, followed by collection of pellet (P) and supernatant (S) fractions. Immunoblot is  
 331 representative of  $n = 3$  independent experiments.

## 332 Discussion

333 Feedback regulation of SM protein levels is conferred by its lipid-sensing SM-N100  
334 domain, which contains structural elements required for cholesterol-accelerated degradation. In  
335 this study, we characterized a truncated form of SM (trunSM) that is produced by partial  
336 proteolysis of the SM-N100 domain. This renders trunSM long-lived, cholesterol-resistant, and,  
337 as the SM-N100 domain is not required for catalysis [34, 35], constitutively active. Truncation  
338 requires ERAD and the proteasome and depends on two features of SM: intrinsic disorder within  
339 the 81–120 region and the stability of the adjacent catalytic domain. Furthermore, the loss of a  
340 membrane-embedded region at the N-terminus causes trunSM to adopt a peripheral association  
341 with the ER membrane. These findings establish a new mechanism affecting the abundance and  
342 activity of SM, with likely consequences for the homeostatic control of cholesterol synthesis.

### 343 Proteasomal truncation of SM

344 The SM-N100 domain contains two cholesterol-sensing elements that enable its  
345 accelerated degradation: a re-entrant loop spanning residues ~15–40 that undergoes a  
346 conformational change in the presence of excess cholesterol [18], and a membrane-associated  
347 amphipathic helix from residues 62–73 that deforms and is ejected from the ER membrane under  
348 similar conditions [17]. Truncation of the SM N-terminus eliminates the SM-N100 re-entrant  
349 loop and likely disrupts the conformation and function of the nearby amphipathic helix,  
350 accounting for the longevity and cholesterol-resistance of the trunSM fragment (Fig. 1C). This  
351 reinforces the importance of these two structural features for the metabolic regulation of full-  
352 length SM, as they have largely been studied only in the context of the isolated SM-N100  
353 domain [17, 18]. Loss of the membrane-embedded re-entrant loop also renders trunSM a  
354 peripheral membrane protein (Fig. 5B), bound to the ER membrane *via* two C-terminal helices  
355 [34]. Proteomic studies have shown that SM partitions to lipid droplets [38, 39], and it is possible  
356 that the peripheral membrane association of trunSM makes it more suited to the lipid droplet  
357 monolayer than its full-length counterpart. This possibility warrants further consideration given  
358 the predicted constitutive activity of trunSM and the lipid droplet localization of lanosterol  
359 synthase, the cholesterol synthesis enzyme immediately downstream of SM [38, 39].

360 Using pharmacological and genetic approaches we found that the truncation of SM, like  
361 its cholesterol-regulated degradation [5], occurs through proteasomal ERAD and requires  
362 Ube2J2, MARCHF6 and VCP (Fig. 3B and 3C; Fig. 6). However, the exact mechanism is  
363 distinct. Truncation is not stimulated by cholesterol (Fig. 1C), depends on a cluster of lysine  
364 residues (Lys-82/90/100) that is dispensable for cholesterol regulation [5, 20], and is independent  
365 of atypical cholesterol-dependent ubiquitination sites within SM-N100 (Fig. 3D) [20]. Instead,  
366 truncation may occur for a subset of SM molecules undergoing a basal degradation route. This is  
367 supported by our finding that upon stabilization of SM by NB-598, complete degradation ceases  
368 and all SM molecules become truncated (Fig. 1B). Indeed, truncation may be a relatively rare

369 event in the absence of NB-598, but the dramatically different stabilities of full-length and  
370 truncated SM lead to an equilibrium where their protein levels are comparable. Combined with  
371 the saturation of ERAD machinery, this may explain why overexpressed SM-V5 is less truncated  
372 than endogenous SM (Supplementary Fig. S3D) despite the two proteins having identical N-  
373 termini. Along similar lines, we previously found that overexpressed SM exhibits blunted  
374 cholesterol regulation [5].

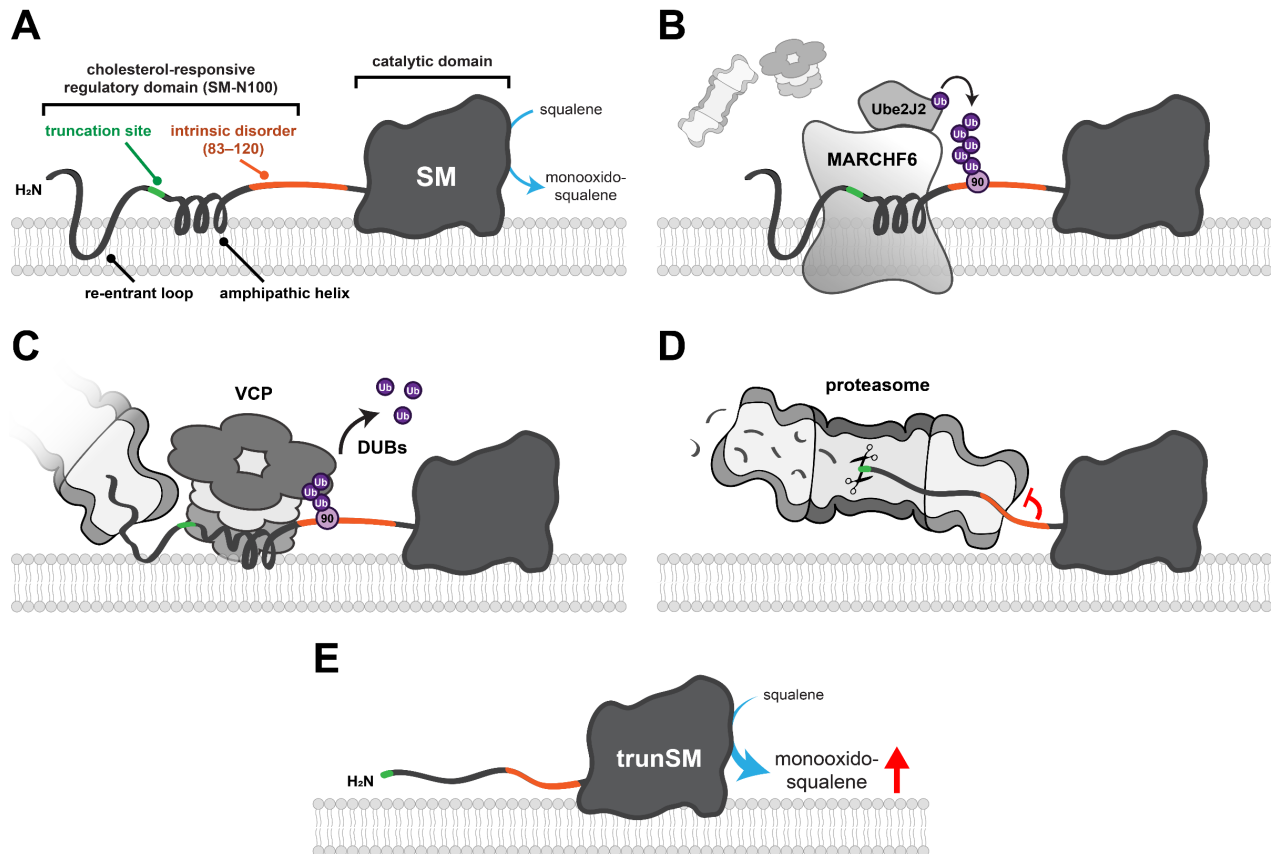

375

### 376 **Figure 6. Model for the mechanism of SM truncation**

377 **(A)** Full-length SM comprises the SM-N100 regulatory domain, containing a cholesterol-sensing  
378 re-entrant loop and amphipathic helix, and the C-terminal catalytic domain that converts  
379 squalene to monooxid-squalene. **(B)** Ube2J2 and MARCHF6 ubiquitinate the SM-N100 domain,  
380 likely at the known ubiquitination site Lys-90. **(C)** VCP is recruited to ubiquitinated SM and  
381 extracts the SM-N100 domain from the ER membrane, enabling the proteasome to begin  
382 degrading SM from its N-terminus. Deubiquitinases (DUBs) are required for this process. **(D)**  
383 The SM 81–120 disordered region impedes unfolding of the adjacent catalytic domain by the  
384 proteasome, preventing further degradation. **(E)** The undegraded portion of SM (trunSM) is  
385 released from the proteasome. The loss of part of the SM-N100 regulatory domain renders  
386 trunSM resistant to cholesterol-induced degradation, and therefore constitutively active.

387           The membrane association of trunSM (Fig. 5A) implies that the proteasome acts on SM  
388 directly at the ER without the need for cytosolic chaperones. While proteasomal recruitment to  
389 the ER has been described, this is generally in the context of interaction with the Sec61  
390 translocon to export and degrade misfolded polypeptides [40]. One notable exception is the  
391 degradation of the yeast cadmium exporter Pca1p, in which interaction between the ubiquitinated  
392 substrate and the proteasome requires Doa10p (the orthologue of MARCHF6) and is bridged by  
393 Cdc48p (the orthologue of VCP) [41]. A similar pathway may be required for the truncation of  
394 SM, and presumably extends to its basal or even cholesterol-accelerated degradation. Precedent  
395 for the latter is found in the sterol-induced degradation of Hmg2p and its mammalian equivalent  
396 HMGCR (another rate-limiting enzyme of cholesterol synthesis), which also involves direct  
397 interaction with the proteasome at the ER membrane [41, 42]. In the case of SM, the AAA+  
398 ATPase VCP likely provides the driving force to extract the membrane-associated components  
399 of the SM-N100 domain for degradation, although MARCHF6 may also contribute given the  
400 retrotranslocase function of Doa10p [43]. The role of deubiquitinases in SM truncation is less  
401 well-defined, but may involve the removal of ubiquitin chains from the Lys-82/90/100 cluster to  
402 facilitate processing by VCP or entry into the proteasome [44, 45]. Ubiquitination of two or more  
403 of these residues is seemingly required for maximal truncation (Fig. 3D), which may explain  
404 why a peptide containing Lys-90 alone was not enriched in a study that used VCP inhibition to  
405 accumulate and capture ERAD substrates [46]. Interestingly, proteasomal substrates with K63-  
406 linked ubiquitin chains are degraded less efficiently than those with the more typical K48-  
407 linkages [47], but whether SM is modified in this way is unknown.

## 408 **Structural determinants of truncation**

409           In establishing SM as a substrate of partial proteasomal degradation, we identify the first  
410 eukaryotic enzyme known to be truncated in this manner. Of the few other reported substrates,  
411 almost all are soluble transcription factors and only two occur in mammalian cells: NF $\kappa$ B subunit  
412 p105 [24] and the Hedgehog signaling transducer Gli3 [25, 48]. Proteasomal truncation may be  
413 activating or inhibitory, depending on the substrate. In the case of NF $\kappa$ B, the proteasome  
414 degrades an inhibitory domain that sequesters the protein to the cytoplasm, thereby enabling its  
415 nuclear translocation [49]. Conversely, the transactivation domain of Gli3 is degraded to yield a  
416 dominant-negative repressor [25]. In yeast, partial degradation of Spt23p and Mga2p liberates  
417 them from the ER membrane to activate lipogenic gene expression, with Spt23p processing  
418 repressed by fatty acids [50]. Proteasomal processing can also have profound consequences at  
419 the organismal level: truncation of Gli3 or the *Drosophila* proteins Lola29M and Shavenbaby  
420 regulates processes including sex determination, differentiation, and stem cell maintenance [25,  
421 28, 51, 52]. Like these examples, the truncation of SM eliminates a regulatory region  
422 (cholesterol-sensing elements of the SM-N100 domain) and yields a fragment with altered  
423 properties (constitutive activity and a peripheral membrane association).

424 For most truncation substrates, including NF $\kappa$ B [53], Gli3 [54] and Def1p [55], partial  
425 degradation requires a two-part signal: a low-complexity sequence (such as a glycine- or  
426 glutamine-rich region) and an adjacent tightly folded domain. The 19S regulatory particle of the  
427 proteasome is thought to poorly transduce an unfolding force when occupied by a low-  
428 complexity sequence, preventing disassembly of the folded domain and allowing substrate  
429 escape [27, 56]. However, we ruled out a low-complexity sequence as a major determinant of  
430 SM truncation (Supplementary Fig. S3A). Unique mechanisms have been described for the  
431 remaining substrates, with the exception of Lola29M where the structural features enabling  
432 truncation are unknown [51]. Spt23p and Mga2p are truncated upon proteasomal engagement at  
433 an internal hairpin loop, which leads to preferential degradation of the C-terminus rather than the  
434 tightly-folded N-terminal domain [29]. Such a mechanism is unlikely to control SM truncation,  
435 which is initiated at the N-terminus (Fig. 4D). In the case of Shavenbaby, a large (~550 residue)  
436 intrinsically disordered domain comprising its degraded portion is juxtaposed with high  
437 predicted order in the adjacent, undegraded domain [28]. This most closely resembles SM, where  
438 truncation depends on the disordered 81–120 region (Fig. 4B), but the much shorter length of  
439 this region clearly represents a distinct signal.

440 On the other hand, the presence of a tightly folded and degradation-resistant domain is  
441 essential for all known examples of partial degradation. SM is no exception, and changes to the  
442 stability of its catalytic domain (*via* NB-598 binding or disruptive point mutations) are closely  
443 correlated with truncation (Fig. 1B and 4E). The split-domain structure of SM, in which  
444 substrate- and cofactor-binding regions are interspersed throughout the primary sequence [34],  
445 may contribute to a compact conformation that is unusually resistant to unfolding and  
446 degradation. Proximity of the catalytic domain to the ER membrane is presumably required for  
447 its interaction with the hydrophobic substrate squalene, and may sterically hinder engagement by  
448 VCP or the proteasome. Our findings thus reinforce the importance of a stable domain for  
449 disrupting proteasomal processivity, while also establishing a unique counterpart in the bipartite  
450 truncation signal: the 81–120 disordered region.

451 How does the 81–120 region promote truncation? The distance from the center of the  
452 proteasomal 20S core particle to the edge of the 19S regulatory particle is ~200 Å [57],  
453 equivalent to ~60 residues of a fully extended polypeptide chain. Therefore, as proteasomal  
454 degradation of SM reaches the predicted truncation site between residues 60 and 70  
455 (Supplementary Fig. S2A), the 81–120 region is translocating through the regulatory particle and  
456 the catalytic domain is on the periphery of the complex. The conspicuous spacing of these three  
457 elements suggests that the 81–120 region is a proteasomal ‘stop signal’ that impedes further  
458 unfolding and incorporation of SM, analogous to the low-complexity sequences of other  
459 substrates (Fig. 6). This may explain why a minimum length of disorder is required for  
460 truncation (Fig. 4B), as well as the need for both the disordered region and catalytic domain  
461 stability. Without the former, the proteasome successfully transduces the force necessary to  
462 unfold the catalytic domain, and without the latter, proteasomal ATPases are still capable of

463 disassembling the catalytic domain in their weakened state. In both cases, complete degradation  
464 is the result (Fig. 4B and 4E). It is noteworthy that the SM truncation site is unaltered when  
465 residues on the N-terminal side of the disorder are removed (Supplementary Fig. S3A) or when  
466 the disorder is duplicated (Fig. 4B), which supports the idea that the proteasome releases trunSM  
467 upon first encountering the 81–120 region.

468 Ubiquitination within residues 81–120 is unlikely to be solely responsible for its effect on  
469 truncation, given that the lowly truncated  $\Delta 91$ –110 mutant (Fig. 4B) retains both Lys-82 and  
470 Lys-90. Likewise, Lys-90 and Lys-100 are not conserved in highly truncated hamster and  
471 chicken orthologues (Fig. 4C). One possibility is that these sequences contain other lysine  
472 residues that serve as alternative ubiquitination sites. However, the number of lysine residues  
473 within orthologous regions (Supplementary Fig. S3B) does not correlate with the extent of  
474 truncation, and partial degradation is observed for a lamprey-derived sequence containing only  
475 one lysine residue. This strongly suggests that the intrinsically disordered nature of the region  
476 promotes truncation, but further work is required to elucidate the precise mechanism.  
477 Interestingly, the partial degradation of Spt23p and NF- $\kappa$ B is augmented by their  
478 homodimerization with a full-length counterpart, which protects the rescued fragment from  
479 complete proteolysis [58, 59]. Disordered regions often provide an interface for protein-protein  
480 interaction [60], and so a similar process may control SM truncation. It is currently unknown if  
481 SM forms dimers *in vivo*, but the transmembrane microprotein CASIMO1 is a confirmed  
482 interactor of SM [61] and GSK-3 $\beta$  was recently reported to associate with the isolated SM-N100  
483 domain [62]. Given that GSK-3 $\beta$  is a soluble protein and much of SM-N100 is membrane-  
484 associated, the hydrophilic 81–100 region is a strong candidate for a binding site. Both  
485 CASIMO1 and GSK-3 $\beta$  are linked with metabolism [61, 63], warranting study into whether they  
486 impact on the production of the constitutively active trunSM.

## 487 **Consequences for cholesterol synthesis**

488 Levels of full-length SM and trunSM are generally comparable across a range of human  
489 cell types (Fig. 1A), indicating that two enzyme pools are maintained: one which is subject to  
490 metabolic regulation and another which is constitutively active. As SM is a rate-limiting enzyme  
491 of cholesterol synthesis, this may establish a baseline level of pathway flux that can be fine-tuned  
492 depending on cholesterol availability. It is striking that amongst distant vertebrate orthologues of  
493 SM, there is strong structural conservation of the intrinsically disordered region (Supplementary  
494 Fig. S3B) and sequence conservation within the catalytic domain [5]. Truncation of SM occurs in  
495 CHO-7 cells (Supplementary Fig. S1) and may be characteristic of higher eukaryotes. Here, the  
496 basal activity of trunSM would permit a steady-state level of cholesterol synthesis to better meet  
497 the demands of multicellular organisms.

498 The presence of trunSM may also avert the complete ablation of SM activity under  
499 conditions of cholesterol excess, which would otherwise delay the eventual resumption of

500 cholesterol synthesis or lead to dramatic accumulation of the substrate squalene [5]. Whilst  
501 previously considered a hydrocarbon intermediate with few biochemical properties, squalene is  
502 protective against cell death induced by lipid peroxidation [11] yet cytotoxic when it is unable to  
503 be effectively sequestered to lipid droplets [10, 64]. Increased squalene levels also accompany  
504 the dermal and gastrointestinal side effects of pharmacological SM inhibition in mammals [12].  
505 Therefore, a persistent population of trunSM may be advantageous in clearing excess squalene  
506 and reducing its aberrant accumulation. Along similar lines, squalene itself stabilizes SM by  
507 binding to the SM-N100 domain and blunting its cholesterol-accelerated degradation [15]. It  
508 remains to be determined if squalene also influences the truncation of SM, given that both  
509 processes depend on MARCHF6 (Fig. 3C) [15]. It is also conceivable that trunSM is relevant in  
510 pathophysiological contexts, given that dysregulation of cholesterol synthesis is implicated in  
511 hepatocellular carcinoma [9] and prostate cancer [65]. However, this possibility awaits future  
512 investigation.

## 513 **Materials and methods**

### 514 **Reagents and cell lines**

515 Fetal calf serum (FCS), newborn calf serum (NCS), high-glucose Dulbecco's Modified  
516 Eagle's Medium (DMEM-HG), Roswell Park Memorial Institute 1640 medium (RPMI),  
517 DMEM/Ham's Nutrient Mixture F-12 (DF-12), penicillin/streptomycin, Opti-MEM reduced  
518 serum medium, RNAiMAX transfection reagent, Lipofectamine 3000 transfection reagent, TRI  
519 reagent, and the SuperScript III First-Strand Synthesis kit were from Thermo-Fisher (Carlsbad,  
520 CA, US). Lipoprotein-deficient serum (LPDS) was prepared from NCS as described previously  
521 [8]. Primers, small interfering RNA (siRNA), protease inhibitor cocktail, and Tween-20 were  
522 from Sigma-Aldrich (St Louis, MO, US). The SensiMix SYBR No-ROX kit was from Biorun  
523 (London, UK). *SmaI* was from New England Biolabs (Ipswich, MA, US). Tris-glycine SDS-  
524 PAGE gels were prepared in-house. Immobilon Western chemiluminescent HRP substrate and  
525 nitrocellulose membranes were from Millipore (Burlington, MA, US). The QIAquick PCR  
526 purification kit was from Qiagen (Hilden, GE). *TransIT-2020* was from Mirus Bio (Madison,  
527 WA, US). Phosphate-buffered saline (PBS) was from UNSW (Sydney, AU). Skim milk powder  
528 was from Fonterra (Richmond, VIC, AU), and bovine serum albumin was from Bovogen  
529 Biologicals (Keilor, VIC, AU). Chemicals were from the following suppliers: cycloheximide  
530 (Sigma-Aldrich C7698), NB-598 (Chemscene CS-1274), cholesterol complexed with  
531 methyl- $\beta$ -cyclodextrin (Chol/CD) (Sigma-Aldrich C4951), CB-5083 (Cayman Chemical  
532 Company 16276), MG132 (Sigma-Aldrich C2211), ALLN (Sigma-Aldrich A6185), PR-619  
533 (Cayman Chemical Company 16276), WP1130 (Cayman Chemical Company 15277),  
534 ammonium chloride (Ajax Finechem 31), bafilomycin A1 (Sigma-Aldrich B1793), methotrexate  
535 (Cayman Chemical Company 13960), Tris-(hydroxy)methylamine (Ajax Finechem 2311),

536 sodium chloride (Ajax Finechem 465); sodium dodecyl sulfate (Sigma-Aldrich 75746),  
537 magnesium chloride (Ajax Finechem 296), hydrochloric acid (Ajax Finechem 256), HEPES  
538 (Sigma-Aldrich 54457), potassium hydroxide (Ajax Finechem 405), potassium chloride (Ajax  
539 Finechem, 383), sodium ethylenediaminetetraacetic acid (Ajax Finechem 180), sodium ethylene  
540 glycol-bis( $\beta$ -aminoethyl ether)-N,N,N',N'-tetraacetic acid (Sigma-Aldrich E8145), sodium  
541 carbonate (Ajax Finechem 463), polyethyleneimine (Sigma-Aldrich 03880), glycine (Ajax  
542 Finechem 1083), methanol (Ajax Finechem 318), dimethyl sulfoxide (Ajax Finechem 2225),  
543 Ponceau S solution (Sigma-Aldrich P7170), glycerol (Ajax Finechem 242), bromophenol blue  
544 (Sigma-Aldrich B0126),  $\beta$ -mercaptoethanol (Sigma-Aldrich M3148).

545 HEK293T cells were a gift from the UNSW School of Medical Sciences (UNSW,  
546 Sydney NSW, Australia), HepG2 and Huh7 cells were gifts from the Centre for Cardiovascular  
547 Research (UNSW, Sydney NSW, Australia), Be(2)-C and HeLaT cells were gifts from Drs.  
548 Louise Lutze-Mann and Noel Whitaker (UNSW, Sydney NSW, Australia), and CHO-7 cells  
549 were a gift from Drs. Joseph Goldstein and Michael Brown (UT Southwestern Medical Center,  
550 Dallas TX, USA).

## 551 **Cell culture**

552 Cells were maintained in a humidified incubator at 37°C and 5% CO<sub>2</sub> in maintenance  
553 medium (DMEM-HG [HEK293T, HepG2, Huh7, Be(2)-C], RPMI [HeLaT] or DF-12 [CHO-7];  
554 10% [v/v] FCS for human cells or 5% [v/v] LPDS [50 mg/mL protein] for CHO-7 cells;  
555 100 U/mL penicillin; 100  $\mu$ g/mL streptomycin). To improve HEK293T and HepG2 surface  
556 adhesion, culture vessels were treated with 25  $\mu$ g/mL polyethyleneimine in phosphate-buffered  
557 saline (PBS) for 15 min prior to cell seeding. Plasmid and siRNA transfections were performed  
558 in maintenance medium lacking penicillin and streptomycin. For all treatments, appropriate  
559 solvent controls were used (water [Chol/CD, ammonium chloride]; dimethyl sulfoxide  
560 [cycloheximide, NB-598, CB-5083, MG132, ALLN, bafilomycin A1, PR-619, WP1130,  
561 methotrexate]) and the final concentration of dimethyl sulfoxide did not exceed 0.2% (v/v) in  
562 cell culture medium. Treatments were delivered in full medium refreshes, and all experiments  
563 were a total of 72 h in duration.

## 564 **Plasmids**

565 A pcDNA3.1/V5-His TOPO expression vector (Invitrogen) encoding the protein-coding  
566 sequence of human SM (NM\_003129.4) fused with three N-terminal HA tags, a C-terminal  
567 linker sequence, and C-terminal V5 and 6  $\times$  His tags ([HA]<sub>3</sub>-SM-V5) was generated previously  
568 in our laboratory by Dr Julian Stevenson. Codon-optimized nucleotide sequences encoding  
569 orthologues of human SM-N100 were previously obtained from GenScript [7], and sequences  
570 encoding orthologues of human SM residues 101–120 were derived using the Integrated DNA



571 Technologies codon optimization tool. Domain insertions and deletions within the (HA)<sub>3</sub>-SM-V5  
572 construct were generated using the polymerase-incomplete primer extension cloning method and  
573 sequence- and ligation-independent cloning method [5, 6], and domain and nucleotide  
574 substitutions were generated using the overlap extension cloning method [4], as described  
575 previously [9]. To generate standards for the absolute quantification of mRNA levels, qRT-PCR  
576 products were amplified from HEK293T cDNA and inserted into the pGL3-Basic vector  
577 (Promega) using the overlap extension cloning method [4]. The identity of all plasmids was  
578 confirmed *via* Sanger dideoxy sequencing. The plasmids used in this study are listed in Table S1,  
579 and the primer sequences used for DNA cloning are listed in Table S2.

### 580 **siRNA and plasmid transfection**

581 To downregulate gene expression or transiently overexpress SM-derived constructs, cells  
582 were seeded into 12-well plates. The next day, cells were transfected with 15 pmol siRNA using  
583 RNAiMAX (Invitrogen; 15 pmol siRNA : 2  $\mu$ L reagent) or 1  $\mu$ g expression vector using  
584 Lipofectamine 3000 (Invitrogen; 1  $\mu$ g DNA : 2  $\mu$ L reagent with 2  $\mu$ L P3000 supplemental  
585 reagent), delivered in Opti-MEM. After 24 h, cells were refreshed in maintenance medium,  
586 treated as specified in figure legends, and harvested 48 h after transfection. The siRNAs used in  
587 this study are listed in Table S1.

### 588 **Protein harvest, SDS-PAGE and immunoblotting**

589 To quantify protein levels, cells were seeded into 12-well plates and treated as specified  
590 in figure legends. Total protein was harvested in 2% SDS lysis buffer (10 mM Tris-HCl  
591 [pH 7.6], 2% [w/v] SDS, 100 mM NaCl) containing 2% [v/v] protease inhibitor cocktail, passed  
592 20 times through a 21-gauge needle, and vortexed for 20 min. Lysate protein content was  
593 quantified using the bicinchoninic acid assay (Thermo-Fisher), and sample concentrations were  
594 normalized by dilution in 2% SDS lysis buffer and 1 $\times$  Laemmli buffer (50 mM Tris-HCl  
595 [pH 6.8], 2% [w/v] SDS, 5% [v/v] glycerol, 0.04% [w/v] bromophenol blue, 1% [v/v]  
596  $\beta$ -mercaptoethanol). Samples were heated at 95°C for 5 min and separated by 10% (w/v) Tris-  
597 glycine SDS-PAGE, unless otherwise specified in figure legends. Proteins were electroblotted  
598 onto nitrocellulose membranes and blocked in 5% skim milk powder (Diploma) in PBS with  
599 0.1% (v/v) Tween-20 (PBST), or in 5% bovine serum albumin in PBST for FLAG detection.  
600 Immunoblotting was performed using rabbit polyclonal anti-SM(SQLE) (Proteintech  
601 12544-1-AP; 1:2,500 at 4°C for 16 h), rabbit monoclonal anti-GAPDH (Cell Signaling  
602 Technology 2118; 1:2,500 at 4°C for 16 h), rabbit monoclonal anti-HA (Cell Signaling  
603 Technology 3724; 1:2,000 at 4°C for 16 h), mouse monoclonal anti-V5 (Invitrogen R960-25;  
604 1:5,000 at room temperature for 1 h), rabbit polyclonal anti-FLAG (Millipore F7425; 1:10,000 at  
605 4°C for 16 h), IRDye 680RD donkey anti-rabbit IgG (LI-COR Biosciences LCR-926-68073;  
606 1:5,000 [SM detection] or 1:10,000 at room temperature for 1 h), IRDye 800CW donkey anti-

607 mouse IgG (LI-COR Biosciences LCR-926-32212; 1:10,000 at room temperature for 1 h),  
608 peroxidase-conjugated AffiniPure donkey anti-rabbit IgG (Jackson ImmunoResearch  
609 Laboratories 711-035-152; 1:10,000 at room temperature for 1 h), and peroxidase-conjugated  
610 AffiniPure donkey anti-mouse IgG (Jackson ImmunoResearch Laboratories 715-035-150;  
611 1:10,000 at room temperature for 1 h). All antibodies were diluted in 5% bovine serum albumin  
612 in PBST, except for anti-FLAG and peroxidase-conjugated antibodies, which were diluted in 5%  
613 skim milk in PBST. Fluorescence-based detection of SM, GAPDH, HA and V5 was performed  
614 using an Odyssey Clx imager (LI-COR Biosciences), and enhanced chemiluminescence-based  
615 detection of FLAG was performed using Immobilon Western chemiluminescent HRP substrate  
616 (Millipore) and an ImageQuant LAS 500 imager (Cytiva Life Sciences). Due to low protein  
617 levels following differential solubilization of microsomal membranes, enhanced  
618 chemiluminescence was used to detect FLAG and V5 in these samples. Densitometry analysis of  
619 fluorescence images was performed using Image Studio Lite v5.2.5 (LI-COR Biosciences).

## 620 RNA harvest and qRT-PCR

621 To quantify *squalene epoxidase (SQLE)* gene expression, cells were seeded in triplicate  
622 into 12-well plates and transfected with siRNA as specified in figure legends. Total RNA was  
623 harvested using TRI reagent (Sigma-Aldrich) and polyadenylated RNA was reverse transcribed  
624 using the SuperScript III First Strand Synthesis kit (Invitrogen). cDNA products were used as the  
625 template for quantitative reverse transcription-PCR (qRT-PCR) using the SensiMix SYBR  
626 No-ROX kit (Bioline). For relative quantification of gene expression, mRNA levels were  
627 normalized to the *porphobilinogen deaminase (PBGD)* housekeeping gene using the comparative  
628  $C_T$  method [10] and adjusted relative to the control siRNA condition, as specified in figure  
629 legends. For absolute quantification of *SQLE* expression, plasmids containing qPCR amplicon  
630 sequences were linearized by digestion with *SmaI* for 1 h and purified using the QIAquick PCR  
631 purification kit (Qiagen). Linearized plasmids were quantified using spectrophotometry, serially  
632 diluted in nuclease-free water to concentrations of between  $\sim 5 \times 10^2$  and  $\sim 5 \times 10^8$  target copies/ $\mu\text{L}$   
633 and used as the template for qPCR in triplicate as described above. A standard curve of  
634  $\log(\text{target sequence copies})$  vs.  $C_T$  value was generated and compared with  $C_T$  values from  
635 cDNA samples to quantify gene expression. Data were expressed in units of cDNA molecules  
636 per  $\mu\text{g}$  of reverse transcribed RNA. The primer sequences used for qRT-PCR in this study are  
637 listed in Table S2.

## 638 Cell fractionation and differential solubilization

639 To examine protein membrane association, cells were seeded into 10 cm dishes and  
640 treated as specified in figure legends. Microsomal membranes were isolated as described in [11]  
641 with some modifications. Briefly, cells were scraped in cold PBS, pelleted at  $1,000 \times g$  and  $4^\circ\text{C}$   
642 for 5 min, and lysed in 500  $\mu\text{l}$  buffer F1 (10 mM HEPES-KOH [pH 7.4], 10 mM KCl, 1.5 mM

643 MgCl<sub>2</sub>, 5 mM sodium EDTA, 5 mM sodium EGTA, 250 mM sucrose, 2% [v/v] protease  
644 inhibitor cocktail). Lysates were centrifuged at 1,000 × g and 4°C for 10 min, and the  
645 supernatant was centrifuged at 20,000 × g and 4°C for 30 min. The 20,000 × g supernatant was  
646 collected and designated the cytosolic fraction. The 20,000 × g pellet was resuspended in 100 μl  
647 buffer F2 (10 mM Tris-HCl [pH 7.4], 100 mM NaCl, 1% [w/v] SDS, 2% [v/v] protease inhibitor  
648 cocktail) and designated the membrane fraction. Protein content was quantified using the  
649 bicinchoninic acid assay (Thermo-Fisher), and sample concentrations were normalized by  
650 dilution in buffer F1 or buffer F2, plus 1× Laemmli buffer, for immunoblotting analysis.

651 To determine the peripheral or integral nature of protein membrane association,  
652 differential solubilization of microsomal membranes was performed as described in [11] with  
653 some modifications. Briefly, cells were seeded into 14.5 cm dishes and transfected with 40 μg  
654 pTK-SM-N100-GFP-V5 expression vector using *TransIT-2020* (Mirus Bio; 1 μg DNA: 2 μL  
655 reagent), delivered in Opti-MEM. After 24 h, cells were refreshed in maintenance medium for a  
656 further 24 h, and microsomal membranes were isolated as described above. Equivalent volumes  
657 of membrane preparations (20 μl) were treated with 200 μl buffer F1, 1% (w/v) SDS (with  
658 10 mM Tris-HCl [pH 7.4]), 0.1 M Na<sub>2</sub>CO<sub>3</sub> (pH 11.5), or 1 M NaCl (with 10 mM Tris-HCl  
659 [pH 7.4]), and incubated at 4°C with end-over-end mixing for 30 min. Mixtures were then  
660 centrifuged at 20,000 × g and 4°C for 30 min. The soluble supernatant fraction was collected,  
661 and the insoluble pellet fraction was resuspended in 200 μl buffer F3 (buffer F1 containing  
662 100 mM NaCl). Equal volumes of supernatant and pellet fractions were mixed with 1× Laemmli  
663 buffer for immunoblotting analysis.

## 664 Sequences and alignments

665 DNA sequences of protein-coding *SQLE* isoforms (*fullSQLE*, NM\_003129.4;  
666 *trunSQLE1*, ENST00000523430.5; *trunSQLE2*, XM\_011517246.2) were obtained from the  
667 RefSeq- (GRCh38.p13 109.20200228) and GENCODE-annotated (GRCh38.p13  
668 GCA\_000001405.28) human genomes. Protein sequences of human SM (*Homo sapiens*,  
669 Q14534), Chinese hamster SM (*Cricetulus griseus*, A0A3L7IPT3), chicken SM (*Gallus gallus*,  
670 A0A1D5NWK3), zebrafish SM (*Danio rerio*, F1QDN5), sea lamprey SM (*Petromyzon marinus*,  
671 S4R6S3) and yeast Erg1p (*Saccharomyces cerevisiae*, P32476) were obtained from the UniProt  
672 database [12]. Protein sequence complexity was predicted using the SEG [13], CAST [14] and  
673 fLPS [15] algorithms, and regions identified by all three tools were defined as low-complexity  
674 sequences. Protein intrinsic disorder was predicted using the online tools SPOT-dis2 [16],  
675 MFDp2 [17], AUCpreD [18], IUPred2A [19], DISOPRED3 [20], PrDOS [21] and DisProt  
676 (VL2E) [22], and residues with an average intrinsic disorder probability of >0.5 were defined as  
677 intrinsically disordered. Protein sequence alignments were generated using Geneious Basic  
678 v2020.1 (Biomatters Ltd.) with a BLOSUM62 cost matrix.

## 679 **Data analysis and presentation**

680 Data were normalized as described in figure legends. Data visualization and statistical  
681 testing were performed using GraphPad Prism v8.4 (GraphPad Software Inc.) as specified in  
682 figure legends. Thresholds for statistical significance were defined as: \*,  $p \leq 0.05$ ; \*\*,  $p \leq 0.01$ .  
683 Schematics and figures were assembled using Adobe Illustrator v24.1 (Adobe Inc.).

## 684 **Acknowledgements**

685 We thank Dr Julian Stevenson for generating the pCMV-(HA)<sub>3</sub>-SM-V5 plasmid used in  
686 this study, Dr Ngee Kiat (Jake) Chua for insightful discussions, and the members of the Brown  
687 laboratory for critically reviewing this manuscript. This work was supported by Australian  
688 Research Council Grant DP170101178 and a NSW Health Investigator Development Grant.  
689 H.W.C. is a recipient of an Australian Research Training Program scholarship.

## 690 **Competing interests**

691 The authors declare that there are no competing interests associated with the manuscript.

## 692 **References**

- 693 1. Ikonen, E. (2008) Cellular cholesterol trafficking and compartmentalization. *Nat. Rev. Mol. Cell Biol.*  
694 **9**, 125–138
- 695 2. Prospective Studies Collaboration (2007) Blood cholesterol and vascular mortality by age, sex, and  
696 blood pressure: A meta-analysis of individual data from 61 prospective studies with 55 000 vascular  
697 deaths. *Lancet.* **370**, 1829–1839
- 698 3. Kuzu, O. F., Noory, M. A., and Robertson, G. P. (2016) The role of cholesterol in cancer. *Cancer Res.*  
699 **76**, 2063–2070
- 700 4. Howe, V., Sharpe, L. J., Alexopoulos, S. J., Kunze, S. V, Chua, N. K., Li, D., and Brown, A. J. (2016)  
701 Cholesterol homeostasis: how do cells sense sterol excess? *Chem. Phys. Lipids.* **199**, 170–178
- 702 5. Gill, S., Stevenson, J., Kristiana, I., and Brown, A. J. (2011) Cholesterol-dependent degradation of  
703 squalene monooxygenase, a control point in cholesterol synthesis beyond HMG-CoA reductase. *Cell*  
704 *Metab.* **13**, 260–273
- 705 6. Belter, A., Skupinska, M., Giel-Pietraszuk, M., Grabarkiewicz, T., Rychlewski, L., and Barciszewski,  
706 J. (2011) Squalene monooxygenase - A target for hypercholesterolemic therapy. *Biol. Chem.* **392**,  
707 1053–1075
- 708 7. Brown, D. N., Caffa, I., Cirmena, G., Piras, D., Garuti, A., Gallo, M., Alberti, S., Nencioni, A.,  
709 Ballestrero, A., and Zoppi, G. (2016) Squalene epoxidase is a bona fide oncogene by amplification

- 710 with clinical relevance in breast cancer. *Sci. Rep.* **6**, 19435
- 711 8. Stopsack, K. H., Gerke, T. A., Sinnott, J. A., Penney, K. L., Tyekucheva, S., Sesso, H. D., Andersson,  
712 S.-O. O., Cerhan, R., Giovannucci, E. L., Mucci, L. A., Rider, J. R., Andr en, O., Cerhan, J. R.,  
713 Giovannucci, E. L., Mucci, L. A., and Rider, J. R. (2016) Cholesterol metabolism and prostate cancer  
714 lethality. *Cancer Res.* **76**, 4785–4790
- 715 9. Liu, D., Wong, C. C., Fu, L., Chen, H., Zhao, L., Li, C., Zhou, Y., Zhang, Y., Xu, W., Yang, Y., Wu,  
716 B., Cheng, G., Lai, P. B.-S., Wong, N., Sung, J. J., and Yu, J. (2018) Squalene epoxidase drives  
717 NAFLD-induced hepatocellular carcinoma and is a direct pharmaceutical target. *Sci. Transl. Med.* **10**,  
718 eaap9840
- 719 10. Mahoney, C. E., Pirman, D., Chubukov, V., Sleger, T., Hayes, S., Fan, Z. P., Allen, E. L., Chen, Y.,  
720 Huang, L., Liu, M., Zhang, Y., McDonald, G., Narayanaswamy, R., Choe, S., Chen, Y., Gross, S.,  
721 Cianchetta, G., Padyana, A. K., Murray, S., Liu, W., Marks, K. M., Murtie, J., Dorsch, M., Jin, S.,  
722 Nagaraja, N., Biller, S. A., Roddy, T., Popovici-Muller, J., and Smolen, G. A. (2019) A chemical  
723 biology screen identifies a vulnerability of neuroendocrine cancer cells to SQLE inhibition. *Nat.*  
724 *Commun.* **10**, 96
- 725 11. Garcia-Bermudez, J., Baudrier, L., Bayraktar, E. C., Shen, Y., La, K., Guarecuco, R., Yucel, B., Fiore,  
726 D., Tavora, B., Freinkman, E., Chan, S. H., Lewis, C., Min, W., Inghirami, G., Sabatini, D. M., and  
727 Birsoy, K. (2019) Squalene accumulation in cholesterol auxotrophic lymphomas prevents oxidative cell  
728 death. *Nature.* **567**, 118–122
- 729 12. Nagaraja, R., Olaharski, A., Narayanaswamy, R., Mahoney, C., Pirman, D., Gross, S., Roddy, T. P.,  
730 Popovici-Muller, J., Smolen, G. A., and Silverman, L. (2020) Preclinical toxicology profile of squalene  
731 epoxidase inhibitors. *Toxicol. Appl. Pharmacol.* **401**, 115103
- 732 13. Horton, J. D., Shah, N. A., Warrington, J. A., Anderson, N. N., Park, S. W., Brown, M. S., and  
733 Goldstein, J. L. (2003) Combined analysis of oligonucleotide microarray data from transgenic and  
734 knockout mice identifies direct SREBP target genes. *Proc. Natl. Acad. Sci. U. S. A.* **100**, 12027–12032
- 735 14. Howe, V., Sharpe, L. J., Prabhu, A. V., and Brown, A. J. (2017) New insights into cellular cholesterol  
736 acquisition: promoter analysis of human HMGCR and SQLE, two key control enzymes in cholesterol  
737 synthesis. *Biochim. Biophys. Acta - Mol. Cell Biol. Lipids.* **1862**, 647–657
- 738 15. Yoshioka, H., Coates, H. W., Chua, N. K., Hashimoto, Y., Brown, A. J., and Ohgane, K. (2020) A key  
739 mammalian cholesterol synthesis enzyme, squalene monooxygenase, is allosterically stabilized by its  
740 substrate. *Proc. Natl. Acad. Sci.* **117**, 7150–7158
- 741 16. Nathan, J. A. (2020) Squalene and cholesterol in the balance at the ER membrane. *Proc. Natl. Acad.*  
742 *Sci.* **117**, 8228–8230
- 743 17. Chua, N. K., Howe, V., Jatana, N., Thukral, L., and Brown, A. J. (2017) A conserved degron  
744 containing an amphipathic helix regulates the cholesterol-mediated turnover of human squalene  
745 monooxygenase, a rate-limiting enzyme in cholesterol synthesis. *J. Biol. Chem.* **292**, 19959–19973
- 746 18. Howe, V., Chua, N. K., Stevenson, J., and Brown, A. J. (2015) The regulatory domain of squalene  
747 monooxygenase contains a re-entrant loop and senses cholesterol via a conformational change. *J. Biol.*  
748 *Chem.* **290**, 27533–27544
- 749 19. Zelcer, N., Sharpe, L. J., Loregger, A., Kristiana, I., Cook, E. C., Phan, L., Stevenson, J., and Brown,  
750 A. J. A. J. (2014) The E3 ubiquitin ligase MARCH6 degrades squalene monooxygenase and affects 3-  
751 hydroxy-3-methyl-glutaryl coenzyme A reductase and the cholesterol synthesis pathway. *Mol. Cell.*  
752 *Biol.* **34**, 1262–1270

- 753 20. Chua, N. K., Hart-Smith, G., and Brown, A. J. (2019) Non-canonical ubiquitination of the cholesterol-  
754 regulated degron of squalene monooxygenase. *J. Biol. Chem.* **294**, 8134–8147
- 755 21. Chua, N. K., Scott, N. A., and Brown, A. J. (2019) Valosin-containing protein mediates the ERAD of  
756 squalene monooxygenase and its cholesterol-responsive degron. *Biochem. J.* **476**, 2545–2560
- 757 22. Stevenson, J., Luu, W., Kristiana, I., and Brown, A. J. (2014) Squalene mono-oxygenase, a key enzyme  
758 in cholesterol synthesis, is stabilized by unsaturated fatty acids. *Biochem. J.* **461**, 435–442
- 759 23. Honscho, M., Dorninger, F., Abe, Y., Setoyama, D., Ohgi, R., Uchiumi, T., Kang, D., Berger, J., and  
760 Fujiki, Y. (2019) Impaired plasmalogen synthesis dysregulates liver X receptor-dependent transcription  
761 in cerebellum. *J. Biochem.* **166**, 353–361
- 762 24. Fan, C.-M., and Maniatis, T. (1991) Generation of p50 subunit of NF- $\kappa$ B by processing of p105  
763 through an ATP-dependent pathway. *Nature.* **354**, 395–398
- 764 25. Wang, B., Fallon, J. F., and Beachy, P. A. (2000) Hedgehog-regulated processing of Gli3 produces an  
765 anterior/posterior repressor gradient in the developing vertebrate limb. *Cell.* **100**, 423–434
- 766 26. Hornbeck, P. V., Zhang, B., Murray, B., Kornhauser, J. M., Latham, V., and Skrzypek, E. (2015)  
767 PhosphoSitePlus, 2014: Mutations, PTMs and recalibrations. *Nucleic Acids Res.* **43**, D512–D520
- 768 27. Tian, L., Holmgren, R. A., and Matouschek, A. (2005) A conserved processing mechanism regulates  
769 the activity of transcription factors Cubitus interruptus and NF- $\kappa$ B. *Nat. Struct. Mol. Biol.* **12**, 1045–  
770 1053
- 771 28. Zanet, J., Benrabah, E., Li, T., Pélissier-Monier, A., Chanut-Delalande, H., Ronsin, B., Bellen, H. J.,  
772 Payre, F., and Plaza, S. (2015) Pri sORF peptides induce selective proteasome-mediated protein  
773 processing. *Science.* **349**, 1356–1358
- 774 29. Piwko, W., and Jentsch, S. (2006) Proteasome-mediated protein processing by bidirectional  
775 degradation initiated from an internal site. *Nat. Struct. Mol. Biol.* **13**, 691–697
- 776 30. Prakash, S., Tian, L., Ratliff, K. S., Lehotzky, R. E., and Matouschek, A. (2004) An unstructured  
777 initiation site is required for efficient proteasome-mediated degradation. *Nat. Struct. Mol. Biol.* doi:  
778 10.1038/nsmb814
- 779 31. Levitskaya, J., Sharipo, A., Leonchiks, A., Ciechanover, A., and Masucci, M. G. (1997) Inhibition of  
780 ubiquitin/proteasome-dependent protein degradation by the Gly-Ala repeat domain of the Epstein-Barr  
781 virus nuclear antigen 1. *Proc. Natl. Acad. Sci. U. S. A.* **94**, 12616–12621
- 782 32. Johnston, J. A., Johnson, E. S., Waller, P. R. H., and Varshavsky, A. (1995) Methotrexate inhibits  
783 proteolysis of dihydrofolate reductase by the N-end rule pathway. *J. Biol. Chem.* doi:  
784 10.1074/jbc.270.14.8172
- 785 33. Georgieva, M. V., Yahya, G., Codó, L., Ortiz, R., Teixidó, L., Claros, J., Jara, R., Jara, M., Iborra, A.,  
786 Gelpí, J. L., Gallego, C., Orozco, M., and Aldea, M. (2015) Inntags: Small self-structured epitopes for  
787 innocuous protein tagging. *Nat. Methods.* **12**, 955–958
- 788 34. Padyana, A. K., Gross, S., Jin, L., Cianchetta, G., Narayanaswamy, R., Wang, F., Wang, R., Fang, C.,  
789 Lv, X., Biller, S. A., Dang, L., Mahoney, C. E., Nagaraja, N., Pirman, D., Sui, Z., Popovici-Muller, J.,  
790 and Smolen, G. A. (2019) Structure and inhibition mechanism of the catalytic domain of human  
791 squalene epoxidase. *Nat. Commun.* **10**, 97
- 792 35. Laden, B. P., Tang, Y., and Porter, T. D. (2000) Cloning, heterologous expression, and enzymological  
793 characterization of human squalene monooxygenase. *Arch. Biochem. Biophys.* **374**, 381–388

- 794 36. Feramisco, J. D., Goldstein, J. L., and Brown, M. S. (2004) Membrane topology of human Insig-1, a  
795 protein regulator of lipid synthesis. *J. Biol. Chem.* **279**, 8487–8496
- 796 37. Fujiki, Y., Hubbard, L., Fowler, S., and Lazarow, P. B. (1982) Isolation of intracellular membranes by  
797 means of sodium carbonate treatment: Application to Endoplasmic Reticulum. *J. Cell Biol.* **93**, 97–102
- 798 38. Pataki, C. I., Rodrigues, J., Zhang, L., Qian, J., Efron, B., Hastie, T., Elias, J. E., Levitt, M., and  
799 Kopito, R. R. (2018) Proteomic analysis of monolayer-integrated proteins on lipid droplets identifies  
800 amphipathic interfacial  $\alpha$ -helical membrane anchors. *Proc. Natl. Acad. Sci.* **115**, E8172–E8180
- 801 39. Bersuker, K., Peterson, C. W. H. W. H., To, M., Sahl, S. J. J., Savikhin, V., Grossman, E. A. A.,  
802 Nomura, D. K. K., and Olzmann, J. A. A. (2018) A proximity labeling strategy provides insights into  
803 the composition and dynamics of lipid droplet proteomes. *Dev. Cell.* **44**, 97–112
- 804 40. Ng, W., Sergeyenko, T., Zeng, N., Brown, J. D., and Römisch, K. (2007) Characterization of the  
805 proteasome interaction with the Sec61 channel in the endoplasmic reticulum. *J. Cell Sci.* **120**, 682–691
- 806 41. Smith, N., Adle, D. J., Zhao, M., Qin, X., Kim, H., and Lee, J. (2016) Endoplasmic reticulum-  
807 associated degradation of Pcalp, a polytopic protein, via interaction with the proteasome at the  
808 membrane. *J. Biol. Chem.* **291**, 15082–15092
- 809 42. Morris, L. L., Hartman, I. Z., Jun, D. J., Seemann, J., and A. DeBose-Boyd, R. (2014) Sequential  
810 actions of the AAA-ATPase valosin-containing protein (VCP)/p97 and the proteasome 19S regulatory  
811 particle in sterol-accelerated, endoplasmic reticulum (ER)- associated degradation of 3-hydroxy-3-  
812 methylglutarylcoenzyme A reductase. *J. Biol. Chem.* **289**, 19053–19066
- 813 43. Schmidt, C. C., Vasic, V., and Stein, A. (2020) Doa10 is a membrane protein retrotranslocase in ER-  
814 associated protein degradation. *Elife.* **9**, e56945
- 815 44. Ernst, R., Mueller, B., Ploegh, H. L., and Schlieker, C. (2009) The otubain YOD1 is a deubiquitinating  
816 enzyme that associates with p97 to facilitate protein dislocation from the ER. *Mol. Cell.* **36**, 28–38
- 817 45. Yao, T., and Cohen, R. E. (2002) A cryptic protease couples deubiquitination and degradation by the  
818 proteasome. *Nature.* **419**, 403–407
- 819 46. Huang, E. Y., To, M., Tran, E., Dionisio, L. T. A., Cho, H. J., Baney, K. L. M., Pataki, C. I., and  
820 Olzmann, J. A. (2018) A VCP inhibitor substrate trapping approach (VISTA) enables proteomic  
821 profiling of endogenous ERAD substrates. *Mol. Biol. Cell.* **29**, 1021–1030
- 822 47. Reichard, E. L., Chirico, G. G., Dewey, W. J., Nassif, N. D., Bard, K. E., Millas, N. E., and Kraut, X.  
823 D. A. (2016) Substrate ubiquitination controls the unfolding ability of the proteasome. *J. Biol. Chem.*  
824 **291**, 18547–18561
- 825 48. Chen, C. H., Von Kessler, D. P., Park, W., Wang, B., Ma, Y., and Beachy, P. A. (1999) Nuclear  
826 trafficking of Cubitus interruptus in the transcriptional regulation of Hedgehog target gene expression.  
827 *Cell.* **98**, 305–316
- 828 49. Blank, V., Kourilsky, P., and Israël, A. (1991) Cytoplasmic retention, DNA binding and processing of  
829 the NF-kappa B p50 precursor are controlled by a small region in its C-terminus. *EMBO J.* **10**, 4159–  
830 4167
- 831 50. Hoppe, T., Matuschewski, K., Rape, M., Schlenker, S., Ulrich, H. D., and Jentsch, S. (2000) Activation  
832 of a membrane-bound transcription factor by regulated ubiquitin/proteasome-dependent processing.  
833 *Cell.* **102**, 577–586
- 834 51. Sato, K., Ito, H., Yokoyama, A., Toba, G., and Yamamoto, D. (2019) Partial proteasomal degradation

- 835 of Lola triggers the male-to-female switch of a dimorphic courtship circuit. *Nat. Commun.*  
836 10.1038/s41467-018-08146-1
- 837 52. Bohère, J., Mancheno-Ferris, A., Al Hayek, S., Zanet, J., Valenti, P., Akino, K., Yamabe, Y., Inagaki,  
838 S., Chanut-Delalande, H., Plaza, S., Kageyama, Y., Osman, D., Polesello, C., and Payre, F. (2018)  
839 Shavenbaby and Yorkie mediate Hippo signaling to protect adult stem cells from apoptosis. *Nat.*  
840 *Commun.* **9**, 1–12
- 841 53. Lin, L., and Ghosh, S. (1996) A glycine-rich region in NF-kappaB p105 functions as a processing  
842 signal for the generation of the p50 subunit. *Mol. Cell. Biol.* **16**, 2248–2254
- 843 54. Pan, Y., and Wang, B. (2007) A novel protein-processing domain in Gli2 and Gli3 differentially blocks  
844 complete protein degradation by the proteasome. *J. Biol. Chem.* **282**, 10846–10852
- 845 55. Wilson, M. D., Harreman, M., Taschner, M., Reid, J., Walker, J., Erdjument-Bromage, H., Tempst, P.,  
846 and Svejstrup, J. Q. (2013) Proteasome-mediated processing of Def1, a critical step in the cellular  
847 response to transcription stress. *Cell.* **154**, 983–995
- 848 56. Nassif, N. D., Cambray, S. E., and Kraut, D. A. (2014) Slipping up: Partial substrate degradation by  
849 ATP-dependent proteases. *IUBMB Life.* **66**, 309–317
- 850 57. Huang, X., Luan, B., Wu, J., and Shi, Y. (2016) An atomic structure of the human 26S proteasome.  
851 *Nat. Struct. Mol. Biol.* **23**, 778–785
- 852 58. Lin, L., DeMartino, G. N., and Greene, W. C. (2000) Cotranslational dimerization of the Rel homology  
853 domain of NF-kappaB1 generates p50-p105 heterodimers and is required for effective p50 production.  
854 *EMBO J.* **19**, 4712–4722
- 855 59. Rape, M., Hoppe, T., Gorr, I., Kalocay, M., Richly, H., and Jentsch, S. (2001) Mobilization of  
856 processed, membrane-tethered SPT23 transcription factor by CDC48UFD1/NPL4, a ubiquitin-selective  
857 chaperone. *Cell.* **107**, 667–677
- 858 60. Wright, P. E., and Dyson, H. J. (2015) Intrinsically disordered proteins in cellular signalling and  
859 regulation. *Nat. Rev. Mol. Cell Biol.* **16**, 18–29
- 860 61. Polycarpou-Schwarz, M., Groß, M., Mestdagh, P., Schott, J., Grund, S. E., Hildenbrand, C., Rom, J.,  
861 Aulmann, S., Sinn, H. P., Vandesompele, J., Diederichs, S., Jo, H.-P. S., Vandesompele, J., and  
862 Diederichs, S. (2018) The cancer-associated microprotein CASIMO1 controls cell proliferation and  
863 interacts with squalene epoxidase modulating lipid droplet formation. *Oncogene.* **37**, 4750–4768
- 864 62. Jun, S. Y., Brown, A. J., Chua, N. K., Yoon, J.-Y., Lee, J.-J., Yang, J. O. K., Jang, I., Jeon, S.-J., Choi,  
865 T.-I., Kim, C.-H., and Kim, N.-S. (2020) Reduction of squalene epoxidase by cholesterol accumulation  
866 accelerates colorectal cancer progression and metastasis. *Gastroenterology* doi:  
867 <https://doi.org/10.1053/j.gastro.2020.09.009>
- 868 63. Patel, P., and Woodgett, J. R. (2017) Glycogen synthase kinase 3: a kinase for all pathways? *Curr. Top.*  
869 *Dev. Biol.* **123**, 277–302
- 870 64. Valachovic, M., Garaiova, M., Holic, R., and Hapala, I. (2016) Squalene is lipotoxic to yeast cells  
871 defective in lipid droplet biogenesis. *Biochem. Biophys. Res. Commun.* **469**, 1123–1128
- 872 65. Stopsack, K. H., Gerke, T. A., Andrén, O., Andersson, S. O., Giovannucci, E. L., Mucci, L. A., and  
873 Rider, J. R. (2017) Cholesterol uptake and regulation in high-grade and lethal prostate cancers.  
874 *Carcinogenesis.* **38**, 806–811

875



## 876 **Supplementary data**

### 877 **Supplementary figures**

878

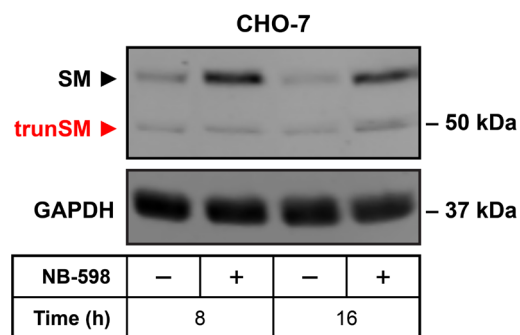

### 879 **Figure S1. Related to Fig. 1**

880 CHO-7 cells express a trunSM-like protein. CHO-7 cells were treated in the presence or absence  
881 of 1  $\mu$ M NB-598 for the indicated times, and immunoblotting was performed for SM and  
882 truncated SM (trunSM, red). Immunoblot is representative of  $n = 2$  independent experiments.

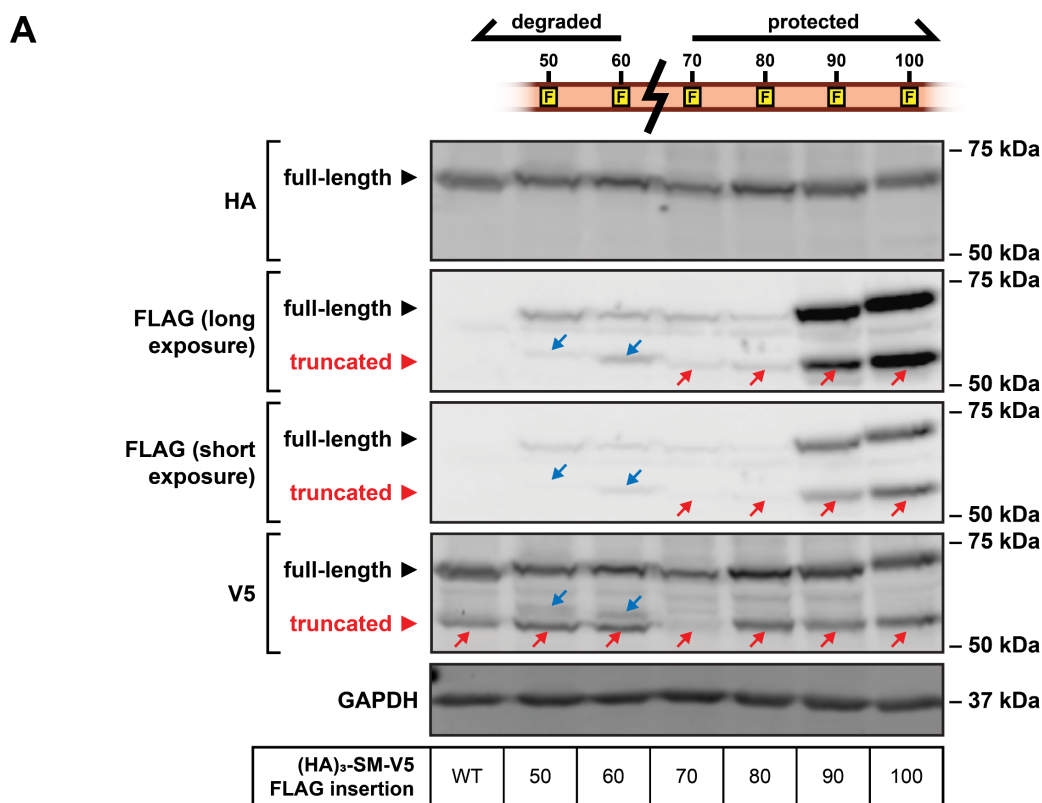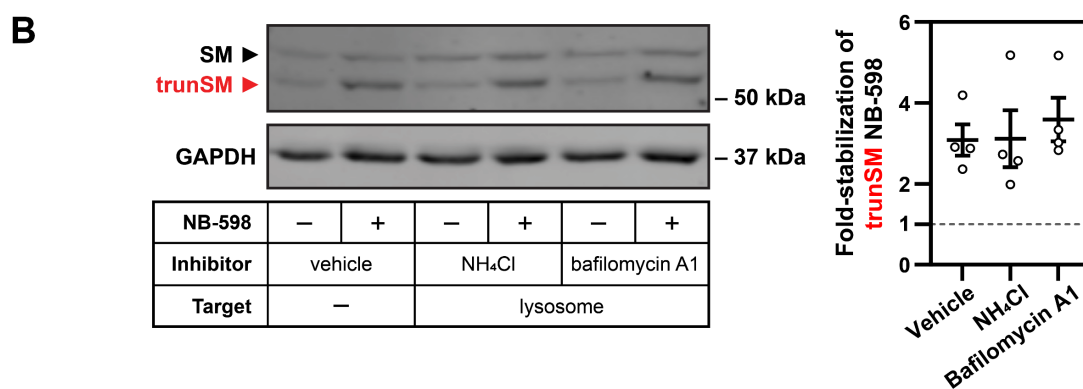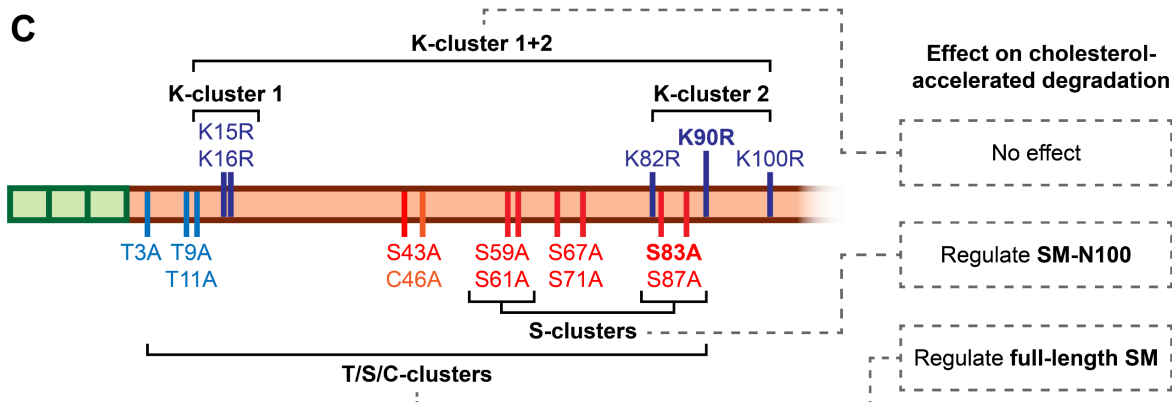

884 **Figure S2. Related to Fig. 3**

885 **(A)** The estimated SM truncation site is between residues 60 and 70. HEK293T cells were  
886 transfected with the indicated constructs for 24 h, treated with 1  $\mu$ M NB-598 for 16 h, and then  
887 treated with 20  $\mu$ M MG132 for 8 h. Immunoblot is representative of  $n \geq 2$  independent  
888 experiments. Red arrows indicate fragments corresponding to trunSM, and blue arrows indicate  
889 additional FLAG-tagged fragments that do not correspond to trunSM.

890 **(B)** SM truncation does not depend on the lysosome. HEK293T cells were treated with 20 mM  
891 ammonium chloride ( $\text{NH}_4\text{Cl}$ ) or 10 nM bafilomycin A1, in the presence or absence of 1  $\mu$ M  
892 NB-598, for 8 h. Graph depicts densitometric quantification of trunSM stabilization by NB-598.  
893 Data presented as mean  $\pm$  SEM from  $n = 4$  independent experiments.

894 **(C)** Schematic of putative ubiquitination sites within the SM-N100 domain. Lysine residues are  
895 not required for cholesterol-accelerated degradation of SM or SM-N100 [1, 2]. Serine residues  
896 are required for maximal cholesterol-accelerated degradation of SM-N100 [1], while clusters of  
897 threonine, cysteine and serine residues are required for maximal cholesterol-accelerated  
898 degradation of full-length SM [1]. Bolded residues indicate known ubiquitination sites [1, 3].

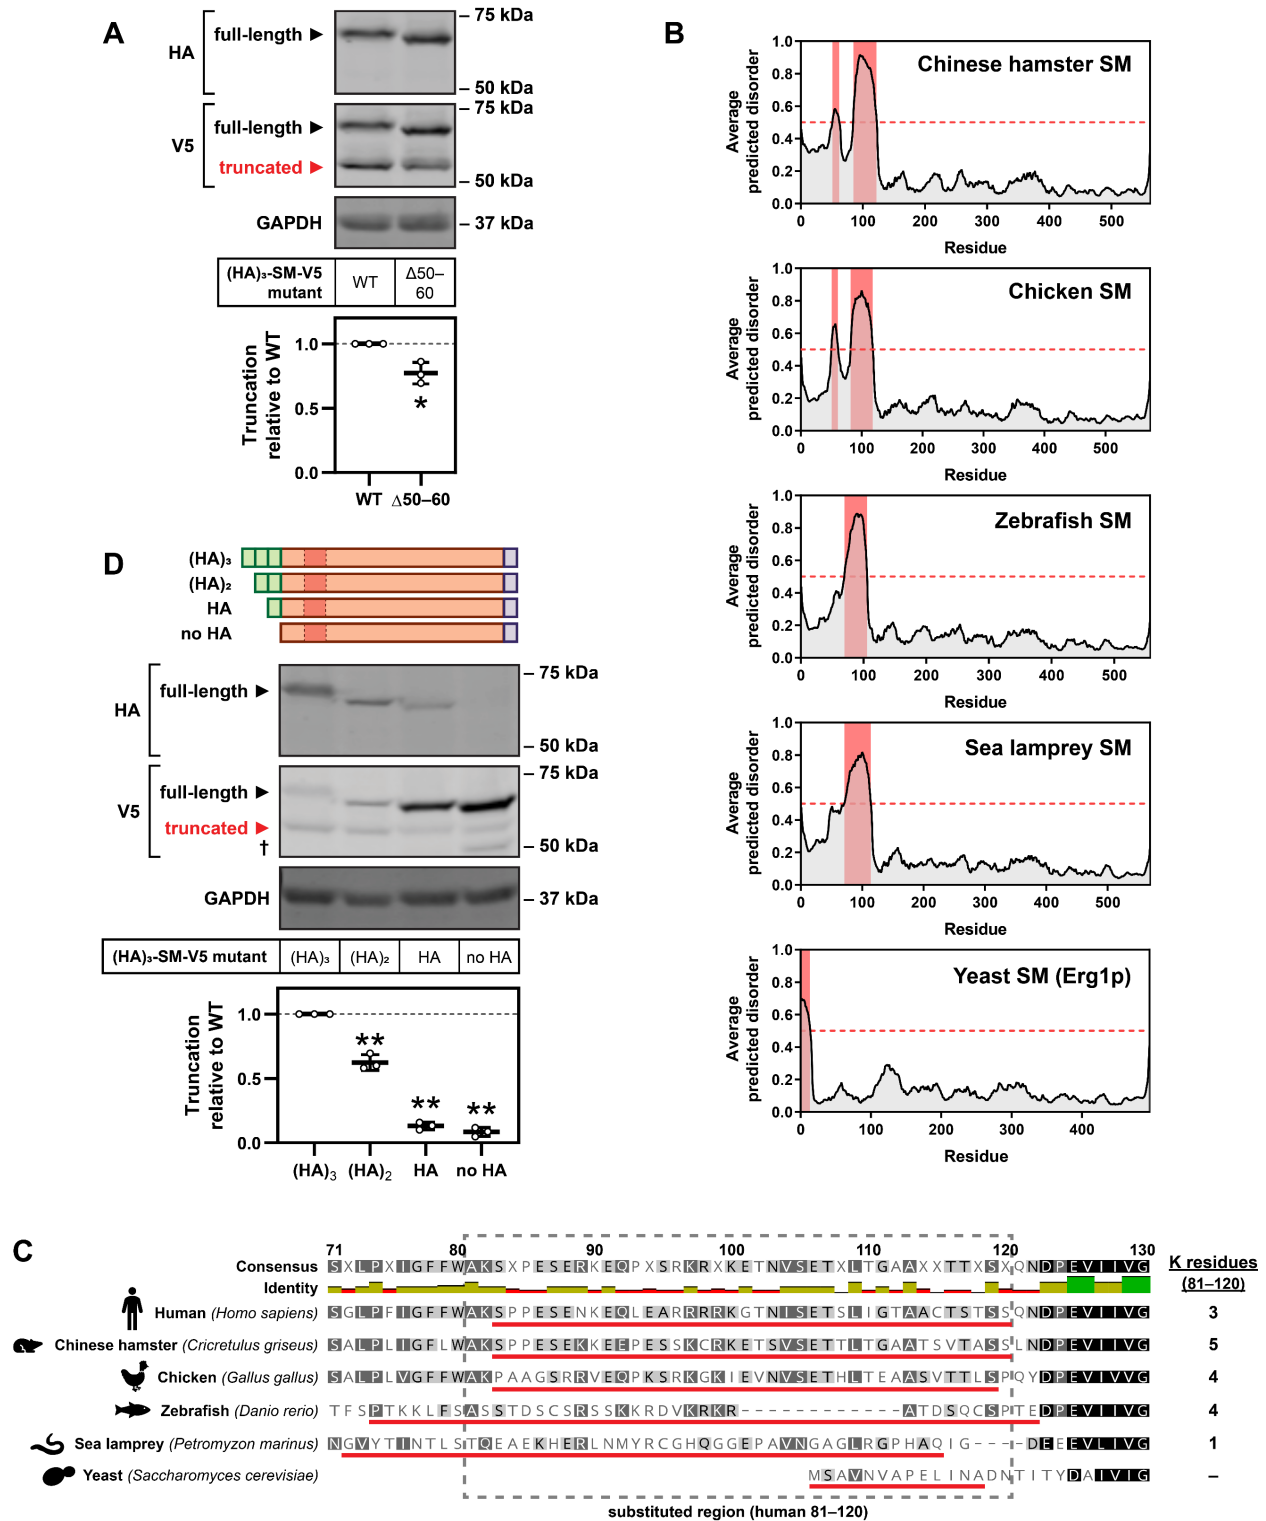

900 **Figure S3. Related to Fig. 4**

901 **(A)** A low-complexity sequence within the SM-N100 domain has a small effect on SM  
902 truncation. HEK293T cells were transfected with the indicated constructs for 24 h and refreshed  
903 in maintenance medium for 24 h. Graph depicts densitometric quantification of truncation  
904 normalized to the wild-type (WT) construct, which was set to 1 (dotted line). Data presented as  
905 mean  $\pm$  SEM from  $n = 3$  independent experiments (\*,  $p \leq 0.05$ , two-tailed paired t-test vs. WT).

906 **(B)** The intrinsic disorder of the SM 81–120 region is highly conserved amongst SM  
907 orthologues. Intrinsically disordered regions (red) are indicated for SM orthologues from  
908 Chinese hamster (*Cricetulus griseus*), chicken (*Gallus gallus*), zebrafish (*Danio rerio*), sea  
909 lamprey (*Petromyzon marinus*) and yeast (*Saccharomyces cerevisiae*).

910 **(C)** The sequence of the SM 81–120 region is poorly conserved amongst SM orthologues.  
911 Alignment of human SM residues 71–130 with SM orthologues from the indicated species. Red  
912 bars indicate regions of intrinsic disorder, and grey dashed box indicates regions that were  
913 substituted into SM constructs in Fig. 4C.

914 **(D)** Removal of HA tags from the SM N-terminus reduces truncation. HEK293T cells were  
915 transfected with the indicated constructs for 24 h and refreshed in maintenance medium for 24 h.  
916 Graph depicts densitometric quantification of truncation normalized to the wild-type (WT)  
917 construct, which was set to 1 (dotted line). Data presented as mean  $\pm$  SEM from  $n = 3$   
918 independent experiments (\*\*,  $p \leq 0.01$ , two-tailed paired t-test vs. WT). Dagger indicates a non-  
919 trunSM fragment.

920 **Supplementary tables**

921 **Table S1. siRNA and plasmids used for transfection**

| <b>siRNA</b>                              | <b>Description</b>                                                                                                                                                                                                                                                                                          |
|-------------------------------------------|-------------------------------------------------------------------------------------------------------------------------------------------------------------------------------------------------------------------------------------------------------------------------------------------------------------|
| SIC001                                    | MISSION® universal negative control #1                                                                                                                                                                                                                                                                      |
| SASI_Hs01_00149248                        | Targets human <i>SQLE</i> exon 9 (NM_003129)                                                                                                                                                                                                                                                                |
| SASI_Hs01_00149256                        | Targets human <i>SQLE</i> exon 1 (NM_003129)                                                                                                                                                                                                                                                                |
| SASI_Hs01_00095058                        | Targets human <i>UBE2J2</i> (NM_058167)                                                                                                                                                                                                                                                                     |
| SASI_Hs01_00105239                        | Targets human <i>MARCHF6</i> (NM_005885)                                                                                                                                                                                                                                                                    |
| SASI_Hs01_00118726                        | Targets human <i>VCP</i> (NM_007126)                                                                                                                                                                                                                                                                        |
| <b>Plasmid</b>                            | <b>Description</b>                                                                                                                                                                                                                                                                                          |
| <i>totalSQLE</i> qRT-PCR standard         | pGL3-Basic vector containing a <i>totalSQLE</i> (NM_003129.4, exon 7) qRT-PCR amplicon sequence.                                                                                                                                                                                                            |
| <i>fullSQLE</i> qRT-PCR standard          | pGL3-Basic vector containing a <i>fullSQLE</i> (NM_003129.4, exon 1) qRT-PCR amplicon sequence.                                                                                                                                                                                                             |
| <i>trunSQLE1</i> qRT-PCR standard         | pGL3-Basic vector containing a <i>trunSQLE1</i> (ENST00000523430.5, exon 1) qRT-PCR amplicon sequence.                                                                                                                                                                                                      |
| <i>trunSQLE2</i> qRT-PCR standard         | pGL3-Basic vector containing a <i>trunSQLE2</i> (XM_011517246.2, exon 1) qRT-PCR amplicon sequence.                                                                                                                                                                                                         |
| pCMV-(HA) <sub>3</sub> -SM-V5             | pcDNA3.1/V5-His TOPO vector containing the coding sequence of human SM (NM_003129.4) fused with three N-terminal HA epitope tags and C-terminal V5 and 6×His epitope tags, under the transcriptional control of a constitutive CMV promoter. Generated previously in our laboratory by Dr Julian Stevenson. |
| pCMV-(HA) <sub>3</sub> -SM-V5 K15R        | pCMV-(HA) <sub>3</sub> -SM-V5 containing an SM K15R substitution.                                                                                                                                                                                                                                           |
| pCMV-(HA) <sub>3</sub> -SM-V5 K16R        | pCMV-(HA) <sub>3</sub> -SM-V5 containing an SM K16R substitution.                                                                                                                                                                                                                                           |
| pCMV-(HA) <sub>3</sub> -SM-V5 K82R        | pCMV-(HA) <sub>3</sub> -SM-V5 containing an SM K82R substitution.                                                                                                                                                                                                                                           |
| pCMV-(HA) <sub>3</sub> -SM-V5 K90R        | pCMV-(HA) <sub>3</sub> -SM-V5 containing an SM K90R substitution.                                                                                                                                                                                                                                           |
| pCMV-(HA) <sub>3</sub> -SM-V5 K100R       | pCMV-(HA) <sub>3</sub> -SM-V5 containing an SM K100R substitution.                                                                                                                                                                                                                                          |
| pCMV-(HA) <sub>3</sub> -SM-V5 K-cluster 1 | pCMV-(HA) <sub>3</sub> -SM-V5 containing SM K15R and K16R substitutions.                                                                                                                                                                                                                                    |
| pCMV-(HA) <sub>3</sub> -SM-V5 K-cluster 2 | pCMV-(HA) <sub>3</sub> -SM-V5 containing SM K82R, K90R and K100R substitutions.                                                                                                                                                                                                                             |

|                                                    |                                                                                                                                                                       |
|----------------------------------------------------|-----------------------------------------------------------------------------------------------------------------------------------------------------------------------|
| pCMV-(HA) <sub>3</sub> -SM-V5<br>K-cluster 1/2     | pCMV-(HA) <sub>3</sub> -SM-V5 containing SM K15R, K16R, K82R, K90R and K100R substitutions.                                                                           |
| pCMV-(HA) <sub>3</sub> -SM-V5<br>S-clusters        | pCMV-(HA) <sub>3</sub> -SM-V5 containing SM S59A, S61A, S83A and S97A substitutions.                                                                                  |
| pCMV-(HA) <sub>3</sub> -SM-V5<br>T/S/C-clusters    | pCMV-(HA) <sub>3</sub> -SM-V5 containing SM T3A, T9A, T11A, S43A, C46A, S59A, S61A, S67A, S71A, S83A and S87A substitutions.                                          |
| pCMV-(HA) <sub>3</sub> -SM-V5<br>Δ81–120           | pCMV-(HA) <sub>3</sub> -SM-V5 containing a deletion of SM residues 81–120.                                                                                            |
| pCMV-(HA) <sub>3</sub> -SM-V5<br>Δ91–110           | pCMV-(HA) <sub>3</sub> -SM-V5 containing a deletion of SM residues 91–110.                                                                                            |
| pCMV-(HA) <sub>3</sub> -SM-V5<br>dup81–120         | pCMV-(HA) <sub>3</sub> -SM-V5 containing a tandem duplication of SM residues 81–120.                                                                                  |
| pCMV-(HA) <sub>3</sub> -SM-V5<br>(Chinese hamster) | pCMV-(HA) <sub>3</sub> -SM-V5 containing a substitution of SM residues 81–120 with <i>Cricetulus griseus</i> SM residues 83–122.                                      |
| pCMV-(HA) <sub>3</sub> -SM-V5<br>(chicken)         | pCMV-(HA) <sub>3</sub> -SM-V5 containing a substitution of SM residues 81–120 with <i>Gallus gallus</i> SM residues 80–119.                                           |
| pCMV-(HA) <sub>3</sub> -SM-V5<br>(zebrafish)       | pCMV-(HA) <sub>3</sub> -SM-V5 containing a substitution of SM residues 81–120 with <i>Danio rerio</i> SM residues 77–104.                                             |
| pCMV-(HA) <sub>3</sub> -SM-V5<br>(sea lamprey)     | pCMV-(HA) <sub>3</sub> -SM-V5 containing a substitution of SM residues 81–120 with <i>Petromyzon marinus</i> SM residues 80–116.                                      |
| pCMV-(HA) <sub>3</sub> -GAR-SM-V5                  | pCMV-(HA) <sub>3</sub> -SM-V5 containing an insertion of a glycine-alanine repeat sequence (AGAGGGAGAGGAGGAGGAGAGGGAG) from the Epstein-Barr virus nuclear antigen-1. |
| pCMV-(HA) <sub>3</sub> -(GAR) <sub>2</sub> -SM-V5  | pCMV-(HA) <sub>3</sub> -SM-V5 containing an insertion of two glycine-alanine repeat sequences from the Epstein-Barr virus nuclear antigen-1.                          |
| pCMV-(HA) <sub>3</sub> -DHFR-SM-V5                 | pCMV-(HA) <sub>3</sub> -SM-V5 containing an insertion of the coding sequence of human dihydrofolate reductase (DHFR, NM_000791.4).                                    |
| pCMV-(HA) <sub>3</sub> -SM-V5<br>Q168A             | pCMV-(HA) <sub>3</sub> -SM-V5 containing an SM Q168A substitution.                                                                                                    |
| pCMV-(HA) <sub>3</sub> -SM-V5<br>Y195A             | pCMV-(HA) <sub>3</sub> -SM-V5 containing an SM Y195A substitution.                                                                                                    |
| pCMV-(HA) <sub>3</sub> -SM-V5<br>Y195F             | pCMV-(HA) <sub>3</sub> -SM-V5 containing an SM Y195F substitution.                                                                                                    |
| pCMV-(HA) <sub>3</sub> -SM-V5<br>Q207A             | pCMV-(HA) <sub>3</sub> -SM-V5 containing an SM Q207A substitution.                                                                                                    |
| pCMV-(HA) <sub>3</sub> -SM-V5<br>F224A             | pCMV-(HA) <sub>3</sub> -SM-V5 containing an SM F224A substitution.                                                                                                    |
| pCMV-(HA) <sub>3</sub> -SM-V5<br>D272A             | pCMV-(HA) <sub>3</sub> -SM-V5 containing an SM D272A substitution.                                                                                                    |

|                                          |                                                                                                                                                                                                                                                                                             |
|------------------------------------------|---------------------------------------------------------------------------------------------------------------------------------------------------------------------------------------------------------------------------------------------------------------------------------------------|
| pCMV-(HA) <sub>3</sub> -SM-V5<br>Y335F   | pCMV-(HA) <sub>3</sub> -SM-V5 containing an SM Y335F substitution.                                                                                                                                                                                                                          |
| pCMV-(HA) <sub>3</sub> -SM-V5<br>Y365A   | pCMV-(HA) <sub>3</sub> -SM-V5 containing an SM Y365A substitution.                                                                                                                                                                                                                          |
| pCMV-(HA) <sub>3</sub> -SM-V5<br>T417S   | pCMV-(HA) <sub>3</sub> -SM-V5 containing an SM T417S substitution.                                                                                                                                                                                                                          |
| pTK-SM-N100-GFP-V5                       | pcDNA3.1/V5-His TOPO vector containing the coding sequence of human SM-N100 (NM_003129.4) fused with green fluorescent protein (GFP) and C-terminal V5 and 6×His epitope tags, under the transcriptional control of a constitutive TK promoter. Generated previously by our laboratory [2]. |
| pCMV-(HA) <sub>3</sub> -SM-V5<br>FLAG50  | pCMV-(HA) <sub>3</sub> -SM-V5 containing a FLAG epitope tag insertion after SM residue 50.                                                                                                                                                                                                  |
| pCMV-(HA) <sub>3</sub> -SM-V5<br>FLAG60  | pCMV-(HA) <sub>3</sub> -SM-V5 containing a FLAG epitope tag insertion after SM residue 60.                                                                                                                                                                                                  |
| pCMV-(HA) <sub>3</sub> -SM-V5<br>FLAG70  | pCMV-(HA) <sub>3</sub> -SM-V5 containing a FLAG epitope tag insertion after SM residue 70.                                                                                                                                                                                                  |
| pCMV-(HA) <sub>3</sub> -SM-V5<br>FLAG80  | pCMV-(HA) <sub>3</sub> -SM-V5 containing a FLAG epitope tag insertion after SM residue 80.                                                                                                                                                                                                  |
| pCMV-(HA) <sub>3</sub> -SM-V5<br>FLAG90  | pCMV-(HA) <sub>3</sub> -SM-V5 containing a FLAG epitope tag insertion after SM residue 90.                                                                                                                                                                                                  |
| pCMV-(HA) <sub>3</sub> -SM-V5<br>FLAG100 | pCMV-(HA) <sub>3</sub> -SM-V5 containing a FLAG epitope tag insertion after SM residue 100.                                                                                                                                                                                                 |
| pCMV-(HA) <sub>3</sub> -SM-V5<br>Δ50–60  | pCMV-(HA) <sub>3</sub> -SM-V5 containing a deletion of SM residues 50–60.                                                                                                                                                                                                                   |
| pCMV-(HA) <sub>2</sub> -SM-V5            | pCMV-(HA) <sub>3</sub> -SM-V5 containing a deletion of one HA epitope tag.                                                                                                                                                                                                                  |
| pCMV-HA-SM-V5                            | pCMV-(HA) <sub>3</sub> -SM-V5 containing a deletion of two HA epitope tags.                                                                                                                                                                                                                 |
| pCMV-SM-V5                               | pcDNA3.1/V5-His TOPO vector containing the coding sequence of human SM (NM_003129.4) fused with C-terminal V5 and 6×His epitope tags, under the transcriptional control of a constitutive CMV promoter. Generated previously in our laboratory [2].                                         |



923 **Table S2. Primers used for qRT-PCR and DNA cloning**

924 Non-annealing nucleotides for DNA insertions, deletions and substitutions are indicated in  
 925 lowercase. Abbreviations for cloning methods: OEC (overlap extension cloning) [4] PIPE  
 926 (polymerase incomplete primer extension cloning) [5]; SLIC (sequence- and ligation-  
 927 independent cloning) [6].

| qRT-PCR primer pair                     |         | Primer sequence (5'–3')                               | Reference                                                                   |                                                  |
|-----------------------------------------|---------|-------------------------------------------------------|-----------------------------------------------------------------------------|--------------------------------------------------|
| <i>PBGD</i>                             | Forward | AGGTTGCCATCCTCAGTCGTC                                 | This study                                                                  |                                                  |
|                                         | Reverse | TTGCCACCACACTGTCCGTC                                  |                                                                             |                                                  |
| <i>totalSQLE</i>                        | Forward | GCTTCCTTCCTCCTTCATCAGTG                               | This study                                                                  |                                                  |
|                                         | Reverse | GCAACAGTCATTCTCCACCA                                  |                                                                             |                                                  |
| <i>fullSQLE</i>                         | Forward | CCAGTTCGCCCTCTTCTCGG                                  | This study                                                                  |                                                  |
|                                         | Reverse | ATTGGTTCCTTTCTGCGCTC                                  |                                                                             |                                                  |
| <i>trunSQLE1</i>                        | Forward | CCCGCGAGGGATGCTGCG                                    | This study                                                                  |                                                  |
|                                         | Reverse | CTTCTGGGTCATTCTGAGAAGATG                              |                                                                             |                                                  |
| <i>trunSQLE2</i>                        | Forward | GGGTAAGGATTGGATTTGTGCC                                | This study                                                                  |                                                  |
|                                         | Reverse | TGGGTCATTCTGAGAAGATGTTGA                              |                                                                             |                                                  |
| DNA cloning primer pair                 |         | Primer sequence (5'–3')                               | Method                                                                      |                                                  |
| <i>totalSQLE</i><br>qRT-PCR<br>standard | Forward | cattccggtactgttgtaaagccaccGCTTCCTTCCTCCTTCATCA<br>GTG | OEC (amplified from HEK293T cDNA and used to extend the pGL3-Basic plasmid) |                                                  |
|                                         | Reverse | ggccggccgccccgactctagaaGCAACAGTCATTCTCCACCA           |                                                                             |                                                  |
| <i>fullSQLE</i><br>qRT-PCR<br>standard  | Forward | cattccggtactgttgtaaagccaccCCAGTTCGCCCTCTTCTCGG        |                                                                             |                                                  |
|                                         | Reverse | ggccggccgccccgactctagaaATTGGTTCCTTTCTGCGCTC           |                                                                             |                                                  |
| <i>trunSQLE1</i><br>qRT-PCR<br>standard | Forward | cattccggtactgttgtaaagccaccCCCGCGAGGGATGCTGCG          |                                                                             |                                                  |
|                                         | Reverse | ggccggccgccccgactctagaaCTTCTGGGTCATTCTGAGAAG<br>ATG   |                                                                             |                                                  |
| <i>trunSQLE2</i><br>qRT-PCR<br>standard | Forward | cattccggtactgttgtaaagccaccGGGTAAGGATTGGATTTGTG<br>CC  |                                                                             |                                                  |
|                                         | Reverse | ggccggccgccccgactctagaaTGGGTCATTCTGAGAAGATGT<br>TGA   |                                                                             |                                                  |
| BGHR2                                   | Reverse | GCGATGCAATTTCTCATT                                    |                                                                             | OEC (generic reverse primer for point mutations) |
| K15R                                    | Forward | GCCACTTTCACCTATTTTTATAgGAAGTTCGGGGACT<br>TCATCAC      |                                                                             | OEC (with BGHR2 reverse)                         |
| K16R                                    | Forward | GCCACTTTCACCTATTTTTATAAGAgGTTTCGGGGACT<br>TCATCAC     |                                                                             |                                                  |
| K82R                                    | Forward | GGCTTCTTCTGGGCCAggTCCCCCCTGAATCAG                     |                                                                             |                                                  |
| K90R                                    | Forward | CAGAAAATAgGGAGCAGCTC                                  |                                                                             |                                                  |
| K100R                                   | Forward | CCAGGAGGCGCAGAAAgGGAACCAATATTTTCAGAAA<br>CAAG         |                                                                             |                                                  |
| K15R / K16R<br>K82R / K90R<br>/ K100R   | Forward | Appropriate mutagenic primer/s                        |                                                                             |                                                  |

|                                                   |                                                                              |                                                                                                                                                                        |                                                                                                                          |
|---------------------------------------------------|------------------------------------------------------------------------------|------------------------------------------------------------------------------------------------------------------------------------------------------------------------|--------------------------------------------------------------------------------------------------------------------------|
| K15R / K16R / K82R / K90R / K100R                 | Forward                                                                      | Appropriate mutagenic primer/s                                                                                                                                         | OEC (with BGHR2 reverse)                                                                                                 |
| S-clusters                                        | <u>Vector:</u><br>Forward<br>Reverse                                         | GGAACCAATATTTTCAGAAACAAGCTTAATAG<br>AGCGTAATCTGGAACGTCATATG                                                                                                            | PIPE<br>(insert amplified from SM-N100 plasmids generated in [1])                                                        |
| T/S/C-clusters                                    | <u>Insert:</u><br>Forward<br>Reverse                                         | gttcagattacgctTGGACTTTTCTGGGCATTGCC<br>TGAAATATTGGTTCTTTTCTGCGC                                                                                                        |                                                                                                                          |
| $\Delta 81-120$                                   | Forward<br>Reverse                                                           | attggcttctctggCAGAATGACCCAGAAGTTATCATCG<br>ttctgggtcattctgCCAGAAGAAGCCAATGAAAGGCAG                                                                                     | PIPE                                                                                                                     |
| $\Delta 91-110$                                   | Forward<br>Reverse                                                           | gaatcagaaaataagGGAACAGCTGCCTGTACATCAAC<br>acaggcagctgttcCCTTATTTTCTGATTACAGGGGGG                                                                                       | PIPE                                                                                                                     |
| dup81-120                                         | <u>Vector:</u><br>Forward<br>Reverse<br><u>Insert:</u><br>Forward<br>Reverse | AAATCCCCCCTGAATCAGAAAATAAGGAG<br>GGCCCAGAAGAAGCCAATGAAAGG<br>ggcttctctgggccAAATCCC<br>ttcaggggggatttCTGAGAAGATGTTGATGTACAGGCAGC                                        | SLIC<br>(insert amplified from pCMV-HA <sub>3</sub> -SM-V5)                                                              |
| 81-120 (Chinese hamster)                          | Forward<br>Reverse                                                           | cctgcctttcattggcttctctggGCCAAGTCACCCCTGAG<br>cacgatgataacttctgggtcattctgAGAAGATGCTGTTACTGAGG<br>TAGC                                                                   |                                                                                                                          |
| 81-120 (chicken)                                  | Forward<br>Reverse                                                           | cctgcctttcattggcttctctggGCCAAGCCCGCCGC<br>cacgatgataacttctgggtcattctgaggagacaatgctgttacagaagccgcctcag<br>tgagggtgggttcggacacgttcacCTCGATCTTGCCCTTCCTG<br>C             | OEC (amplified from SM-N100-GFP-V5 plasmids generated in [7] and used to extend the pCMV-HA <sub>3</sub> -SM-V5 plasmid) |
| 81-120 (zebrafish)                                | Forward<br>Reverse                                                           | cctgcctttcattggcttctctggGCCTCTAGCACCGATAGCTG<br>cacgatgataacttctgggtcattctgtgggtacattgGGAATCTGTGGCT<br>CTCTTCCG                                                        |                                                                                                                          |
| 81-120 (sea lamprey)                              | Forward<br>Reverse                                                           | cctgcctttcattggcttctctggACCCAGGAAGCAGAAAAACAC<br>G<br>cacgatgataacttctgggtcattctgaccaattggcggtgaggccccggaggccc<br>gcaccattgacggccggCTCTCCCCCTGGTGC                     |                                                                                                                          |
| pCMV-(HA) <sub>3</sub> -GAR-SM-V5                 | <u>Vector:</u><br>Forward<br>Reverse<br><u>GAr generation:</u><br>Forward    | TGGACTTTTCTGGGCATTGCC<br>AGCGTAATCTGGAACGTCATATG<br>GCTGGAGCAGGCGGTGGAGCAGGTGCTGGAGGTGC<br>AGGTGGAGCAGGCGGTGCAGGAGCA                                                   | SLIC<br>(‘GAr generation’ primers extended and used as template for insert amplification)                                |
| pCMV-(HA) <sub>3</sub> -(GAR) <sub>2</sub> -SM-V5 | Reverse<br><u>Insert:</u><br>Forward<br>Reverse                              | ACCTGCTCCACCTCCAGCACCTGCACCACCTGCTCC<br>TGCACCGCCTGCTCCACCTGCACC<br>tccatagacgttccagattacgctGCTGGAGCAGGCGGTGGAGC<br>gaaagtggcaatgccagaaaagtccaACCTGCTCCACCTCCAGCA<br>C |                                                                                                                          |

|                                    |                |                                                       |  |                                           |
|------------------------------------|----------------|-------------------------------------------------------|--|-------------------------------------------|
| pCMV-(HA) <sub>3</sub> -DHFR-SM-V5 | <u>Vector:</u> |                                                       |  | PIPE (insert amplified from HEK293T cDNA) |
|                                    | Forward        | TGGACTTTTCTGGGCATTGCC                                 |  |                                           |
|                                    | Reverse        | AGCGTAATCTGGAACGTCATATG                               |  |                                           |
|                                    | <u>Insert:</u> |                                                       |  |                                           |
|                                    | Forward        | gttcagattacgctGTTGGTTCGCTAAACTGCATCG                  |  |                                           |
|                                    | Reverse        | gcccagaaaagtccAATCATTCTTCTCATATACTTCAAATTTGTAC        |  |                                           |
| Q168A                              | Forward        | GTTGGAGAATTCTGgccCCGGGTGGTTATC                        |  |                                           |
| Y195A                              | Forward        | CCAGGTTGTAATGGTgcCATGATTCATGATCAGG                    |  |                                           |
| Y195F                              | Forward        | CCAGGTTGTAATGGTtCATGATTCATGATCAGG                     |  |                                           |
| Q207A                              | Forward        | AAAGCAAATCAGAGGTTgccATTCTTACCCTCTGTC                  |  |                                           |
| F224A                              | Forward        | CAGAGTGGAGAGCTgcCCATCACGGAAGATTC                      |  |                                           |
| D272A                              | Forward        | AGGATAAAGAGACTGGAGccATCAAGGAACTCCATGC                 |  | OEC (with BGHR2 reverse)                  |
| Y335F                              | Forward        | GTCCAGTTCTCATCTtCCAGATTCATCCAG                        |  |                                           |
| Y365A                              | Forward        | GAATACATGGTTGAAAAAATTgcCCCACAAATACCTGATC              |  |                                           |
| T417S                              | Forward        | AATATGAGGCATCCACTTtCTGGTGGAGGAATGACTG                 |  |                                           |
| FLAG50 insertion                   | Forward        | gactacaagacgatgacgacaagGGGGGTCTCCTCGGGC               |  | PIPE                                      |
|                                    | Reverse        | cttgtgcatcgtctttgtagtcGTTTCGGTGGCGACAGC               |  |                                           |
| FLAG60 insertion                   | Forward        | gactacaagacgatgacgacaagTCCCAGTTCGCCCTTCTCG            |  | PIPE                                      |
|                                    | Reverse        | cttgtgcatcgtctttgtagtcGCCGCTCTGCTGGCGCC               |  |                                           |
| FLAG70 insertion                   | Forward        | gactacaagacgatgacgacaagTCAGGCCTGCCTTTCATTGGC          |  | PIPE                                      |
|                                    | Reverse        | cttgtgcatcgtctttgtagtcGAGAATATCCGAGAAGAGGGCGAAC       |  |                                           |
| FLAG80 insertion                   | Forward        | gactacaagacgatgacgacaagGCCAAATCCCCCCTGAATC            |  | PIPE                                      |
|                                    | Reverse        | cttgtgcatcgtctttgtagtcCCAGAAGAAGCCAATGAAAGGC          |  |                                           |
| FLAG90 insertion                   | Forward        | gactacaagacgatgacgacaagGAGCAGCTCGAGGCCAGGAG           |  | PIPE                                      |
|                                    | Reverse        | cttgtgcatcgtctttgtagtcCTTATTTTCTGATTACAGGGGGGATTTG    |  |                                           |
| FLAG100 insertion                  | Forward        | gactacaagacgatgacgacaagGGAACCAATATTTTCAGAAAC          |  | PIPE                                      |
|                                    | Reverse        | AAGCTTAATAGGcttgtgcatcgtctttgtagtcTTTTCTGCGCCTCCTGGCC |  |                                           |
| Δ50–60                             | Forward        | TACCGCTGTCGCCACCGATCCCAGTTCGCCCTCTTCTCG               |  | PIPE (primers designed in [7])            |
|                                    | Reverse        | TCGGTGGCGACAGCGGTAGGAGAGCAC                           |  |                                           |
| ΔHA                                | Forward        | cctgactatcgggCTATCCATATGACGTTCCAGATTAC                |  | PIPE                                      |
|                                    | Reverse        | aacgcatatggataGCCCGCATAGTCAGGAACAT                    |  |                                           |
| Δ(HA) <sub>2</sub>                 | Forward        | ggaattgcccttatgTATCCATATGACGTTCCAGATTAC               |  | PIPE                                      |
|                                    | Reverse        | aacgcatatggataCATAAGGGCAATTCCACCACA                   |  |                                           |

## 929 Supplementary references

- 930 1. Chua, N. K., Hart-Smith, G., and Brown, A. J. (2019) Non-canonical ubiquitination of the  
931 cholesterol-regulated degron of squalene monooxygenase. *J. Biol. Chem.* **294**, 8134–8147
- 932 2. Gill, S., Stevenson, J., Kristiana, I., and Brown, A. J. (2011) Cholesterol-dependent degradation of  
933 squalene monooxygenase, a control point in cholesterol synthesis beyond HMG-CoA reductase.  
934 *Cell Metab.* **13**, 260–273
- 935 3. Hornbeck, P. V., Zhang, B., Murray, B., Kornhauser, J. M., Latham, V., and Skrzypek, E. (2015)  
936 PhosphoSitePlus, 2014: Mutations, PTMs and recalibrations. *Nucleic Acids Res.* **43**, D512–D520
- 937 4. Bryksin, A. V., and Matsumura, I. (2010) Overlap extension PCR cloning: a simple and reliable  
938 way to create recombinant plasmids. *Biotechniques.* **48**, 463–465
- 939 5. Klock, H. E., and Lesley, S. A. (2009) The polymerase incomplete primer extension (PIPE)  
940 method applied to high-throughput cloning and site-directed mutagenesis. in *Methods in*  
941 *Molecular Biology* (Doyle, S. A. ed), pp. 91–103, Humana Press, Totowa, NJ, **498**, 91–103
- 942 6. Li, M. Z., and Elledge, S. J. (2007) Harnessing homologous recombination in vitro to generate  
943 recombinant DNA via SLIC. *Nat. Methods.* **4**, 251–256
- 944 7. Chua, N. K., Howe, V., Jatana, N., Thukral, L., and Brown, A. J. (2017) A conserved degron  
945 containing an amphipathic helix regulates the cholesterol-mediated turnover of human squalene  
946 monooxygenase, a rate-limiting enzyme in cholesterol synthesis. *J. Biol. Chem.* **292**, 19959–19973
- 947 8. Goldstein, J. L., Basu, S. K., and Brown, M. S. (1983) Receptor-mediated endocytosis of low-  
948 density lipoprotein in cultured cells. *Methods Enzymol.* **98**, 241–260
- 949 9. Stevenson, J., Krycer, J. R., Phan, L., and Brown, A. J. (2013) A practical comparison of ligation-  
950 independent cloning techniques. *PLoS One.* **8**, e83888
- 951 10. Schmittgen, T. D., and Livak, K. J. (2008) Analyzing real-time PCR data by the comparative CT  
952 method. *Nat. Protoc.* **3**, 1101–1108
- 953 11. Zerenturk, E. J., Sharpe, L. J., and Brown, A. J. (2014) DHCR24 associates strongly with the  
954 endoplasmic reticulum beyond predicted membrane domains: implications for the activities of this  
955 multi-functional enzyme. *Biosci. Rep.* **34**, e00098
- 956 12. The UniProt Consortium (2017) UniProt: the universal protein knowledgebase. *Nucleic Acids Res.*  
957 **45**, D158–D169
- 958 13. Wootton, J. C., and Federhen, S. (1996) Analysis of compositionally biased regions in sequence  
959 databases. *Methods Enzymol.* **266**, 554–571
- 960 14. Promponas, V. J., Enright, A. J., Tsoka, S., Kreil, D. P., Leroy, C., Hamodrakas, S., Sander, C.,  
961 and Ouzounis, C. A. (2000) CAST: an iterative algorithm for the complexity analysis of sequence  
962 tracts. *Bioinformatics.* **16**, 915–922
- 963 15. Harrison, P. M. (2017) fLPS: fast discovery of compositional biases for the protein universe. *BMC*  
964 *Bioinformatics.* **18**, 476
- 965 16. Hanson, J., Yang, Y., Paliwal, K., and Zhou, Y. (2017) Improving protein disorder prediction by

- 966 deep bidirectional long short-term memory recurrent neural networks. *Bioinformatics*. **33**, 685–  
967 692
- 968 17. Mizianty, M., Peng, Z., and Kurgan, L. (2013) MFDp2: accurate predictor of disorder in proteins  
969 by fusion of disorder probabilities, content and profiles. *Intrinsically Disord. Proteins*. **1**, e24428
- 970 18. Wang, S., Ma, J., and Xu, J. (2016) AUCpreD: Proteome-level protein disorder prediction by  
971 AUC-maximized deep convolutional neural fields. *Bioinformatics*. **32**, i672–i679
- 972 19. Mészáros, B., Erdős, G., and Dosztányi, Z. (2018) IUPred2A: context-dependent prediction of  
973 protein disorder as a function of redox state and protein binding. *Nucleic Acids Res.* **46**, W329–  
974 W337
- 975 20. Jones, D. T., and Cozzetto, D. (2015) DISOPRED3: precise disordered region predictions with  
976 annotated protein-binding activity. *Bioinformatics*. **31**, 857–863
- 977 21. Ishida, T., and Kinoshita, K. (2007) PrDOS: prediction of disordered protein regions from amino  
978 acid sequence. *Nucleic Acids Res.* **35**, W460–W464
- 979 22. Peng, K., Radivojac, P., Vucetic, S., Dunker, A. K., and Obradovic, Z. (2006) Length-dependent  
980 prediction of protein in intrinsic disorder. *BMC Bioinformatics*. **7**, 208
- 981
